# Supplementary material for: Novel CO2-philic porous organic polymers synthesized in water: a leap towards eco-sustainability
Source: Royal Society of Chemistry journal article supplement (doi:10.1039/d4su00479e), 2024-01-01
Supplement: d4su00479e1.pdf [file d4su00479e1.pdf]

# Supporting Information

## Novel CO<sub>2</sub>-Philic Porous Organic Polymers Synthesised in Water: A Leap towards Eco-Sustainability

Riccardo Mobili,<sup>a,‡</sup> Yue Wub,<sup>b</sup> Charl Xavier Bezuidenhout,<sup>c</sup> Sonia La Cognata,<sup>a</sup> Silvia Bracco<sup>c\*</sup>,  
Mariolino Carta<sup>b\*</sup> and Valeria Amendola<sup>a\*</sup>

### Index

|                                             |     |
|---------------------------------------------|-----|
| 1. Materials and Methods                    | S2  |
| 2. Synthesis                                | S5  |
| 3. Physicochemical characterization of POPs | S8  |
| 4. Gas adsorption studies                   | S27 |
| 5. References                               | S42 |

---

<sup>a</sup> Department of Chemistry, University of Pavia  
viale Tarquato Taramelli 12, Pavia, 27100, Italy  
e-mail: valeria.amendola@unipv.it

<sup>b</sup> Department of Chemistry, Faculty of  
Science and Engineering, Swansea University  
Singleton Park, Swansea, Wales, SA2 8PP (UK)  
e-mail: mariolino.carta@swansea.ac.uk

<sup>c</sup> Department of Materials Science, University of Milano-Bicocca  
Via Cozzi 55, Milano, 20125, Italy

‡ present address: Sorbonne Université, CNRS, Institut Parisien de Chimie Moléculaire, 4 Place Jussieu, 75005 Paris, France

## 1. Materials and Methods

All commercially available starting materials, including 1,3,5-tris(bromomethyl)-2,4,6-triethylbenzene ( $\geq 98\%$ ), 1,3,5-tris(bromomethyl)-mesitylene ( $\geq 98\%$ ), phloroglucinol dihydrate ( $\geq 99\%$ ) and HPLC grade solvents, were purchased from Merck, Sigma-Aldrich and VWR and used without further purification. 1,3,5-tris(methylamino)-2,4,6-triethylbenzene ( $\text{EtNH}_2$ ), 1,3,5-tris(methylamino)-mesitylene ( $\text{MeNH}_2$ ) and triformylphloroglucinol (TFP) were synthesized following already known procedures,<sup>S1-S3</sup> starting from purchasable compounds. The polymers syntheses were conducted in WHEATON® liquid scintillation vials (Sigma-Aldrich) closed with a screw cap (capacity: 20 mL); the reaction conditions were not controlled to exclude moisture or oxygen.

Characterization spectra obtained for  $\text{EtNH}_2$ ,  $\text{MeNH}_2$  and TFP were in line with those reported in the literature.  $^1\text{H-NMR}$  spectra were recorded on a Bruker AVANCEIII 400 MHz (operating at 9.37 T, 400 MHz), equipped with a 5 mm BBO probe head with Z-gradient (Bruker BioSpin). Deuterated solvents used for NMR analysis were purchased and used as received. Chemical shifts are reported in ppm with the residual solvent as internal reference. The data were processed with Topspin 4.1 (Bruker Biospin). Elemental analyses were conducted on a Perkin Elmer CHN 2400SERIES II ELEMENTAL ANALYZER at the Department of Chemistry of the University of Milano (Italy).

For the Fourier Transform – Infrared analysis (FT-IR), a Nicolet FT-IR iS10 spectrometer (Nicolet, Madison, WI, USA) equipped with attenuated total reflectance (ATR) sampling accessory (Smart iTR with diamond plate) was used. Thirty-two scans in the  $4000\text{--}600\text{ cm}^{-1}$  range at  $4\text{ cm}^{-1}$  resolution were co-added. Well-ground powder samples were used, and spectra were obtained after pressing the sample onto an ATR diamond crystal at room temperature ( $20\text{ }^\circ\text{C}$ ).

Powder x-ray diffraction (PXRD) measurements were performed with a Rigaku Smarlab powder diffractometer using  $\text{Cu-K}\alpha$  radiation at 40 kV and 20 mA scanning over a range of  $2.0\text{--}80.0^\circ$   $2\theta$  with a step size of  $0.01^\circ$  and a scan speed of  $1.5^\circ/\text{min}$ . The experiments was performed in air using a 0.2 mm depth sample holder.

Elemental analysis was performed with a vario MICRO Element Analyzer in CHNS mode.

Thermogravimetric analysis (TGA) was performed on a Q5000 apparatus (TA Instruments, New Castle, DE, USA) interfaced with a TA5000 data station under nitrogen flux ( $10 \text{ mL min}^{-1}$ ) in a platinum pan by heating about 3 mg of sample from room temperature up to  $650 \text{ }^\circ\text{C}$  (heating rate  $5 \text{ K min}^{-1}$ ). TGA data were analyzed by the Universal Analysis software by TA Instruments.

Differential scanning calorimetry (DSC) was performed by a Q2000 apparatus (TA Instruments, New Castle, DE, USA) interfaced with a TA5000 data station by heating about 3 mg of samples in an open aluminium crucible from  $-75 \text{ }^\circ\text{C}$  to  $350 \text{ }^\circ\text{C}$ , cooling down to  $-75^\circ\text{C}$  and heating up to room temperature (heating and cooling rate =  $5 \text{ K min}^{-1}$ ) under nitrogen flux ( $50 \text{ mL min}^{-1}$ ). The temperature accuracy of the instrument is  $\pm 0.1 \text{ }^\circ\text{C}$ , the precision is  $\pm 0.01 \text{ }^\circ\text{C}$ , and the calorimetric reproducibility is  $\pm 0.05\%$ . DSC data were analysed by the Universal Analysis software by TA Instruments.

A Zeiss EVO MA10 (Carl Zeiss, Oberkochen, Germany) Scanning Electron Microscope (SEM) was used for the morphological study on gold sputtered samples (Secondary Electrons detector). The measurements were performed at 20 kV with a working distance of 8.5 mm.

$^{13}\text{C}$  and  $^1\text{H}$  solid-state NMR experiments were carried out with a Bruker NEO 300 instrument operating at a static field of 7.04 T equipped a 4 mm double resonance MAS probe.  $^{13}\text{C}\{^1\text{H}\}$  ramped-amplitude Cross Polarization (CP) experiments were performed at 298 K at a spinning speed of 12.5 kHz using a recycle delay of 5 s and contact times of 2 ms and 50  $\mu\text{s}$ . The  $90^\circ$  pulse for proton was 2.9 ms.  $^{13}\text{C}$  SPE MAS spectra were collected with a recycle delay of 60 s. Crystalline polyethylene was taken as an external reference at 32.8 ppm from TMS. Quantitative solid-state  $^1\text{H}$  MAS NMR spectra were performed at a spinning speed of 12.5 kHz using a recycle delay of 20 s. The  $^1\text{H}$  chemical shift was referenced to adamantane.

For the gas adsorption studies the samples were weighed in a Quantachrome adsorption cell and outgassed under vacuum for 15 hours at 353 K.

$\text{N}_2$  (298 K) and  $\text{CO}_2$  (195 K, 273 K and 298 K) adsorption/desorption measurements were made using a Quantachrome Nova-e. Samples were degassed for 800 min at  $100 \text{ }^\circ\text{C}$  under high vacuum prior to analysis. The gases were supplied by BOC and used without any further purification ( $\text{N}_2$  purity  $> 99.999$ ,  $\text{CO}_2$  purity  $> 99.995\%$ ). The specimen was measured twice after outgas in two different cells to minimize the error, providing the same results. The data were analysed with the software provided with the instrument. The BET was calculated at a relative pressure  $P/P_0 < 0.1$ .

NLDFT and H-K analysis were performed to calculate the pore size distribution and volume, considering a carbon equilibrium transition kernel at 273 K based on a slit-pore model; the kernel is based on a common, one centre, Lennard-Jones model.  $P_0$  always refers to 1 bar, which is the maximum pressure reached by the instrument, not the saturation pressure of the probe gas. To assess the potential chemisorption, heats of adsorption were calculated from the CO<sub>2</sub> curves measured at 273K and 298K. The data were analysed with the QuadraWin software and fitted with the Langmuir-Freundlich equation and calculated via the Clausius-Clapeyron equation.

## 2. Synthesis

The starting amines were prepared following a procedure already known in the literature.<sup>S1-S3</sup> The synthesis and characterization of 1,3,5-tris(methylamino)-2,4,6-triethylbenzene (EtNH<sub>2</sub>) has been reported by our group in a recent work.<sup>S1</sup> The employed building blocks, EtNH<sub>2</sub>, MeNH<sub>2</sub>, and TFP, have been characterized by <sup>1</sup>H-NMR (Figures S1-S3) and FTIR (Figures S12-S13), and the obtained spectra corresponded to those reported in the literature for these compounds.<sup>S1-S3</sup>

### 2.1 Synthesis of 1,3,5-tris(methylamino)-2,4,6-trimethylbenzene<sup>S2</sup> (MeNH<sub>2</sub>)

Potassium phthalamide (5.84 g, 31.6 mmol, 3.6 eq.) was added to a solution of 1,3,5-tris(bromomethyl)-2,4,6-trimethylbenzene (3.50 g, 8.77 mmol, 1 eq.) and 18-crown-6 (0.69 g, 2.63 mmol, 0.3 eq.) in toluene (30 mL). The mixture was refluxed under nitrogen for about 24 h. The solid residue, collected after concentrating the mixture in vacuo, was suspended in water (50 mL) and collected by filtration. The resulting solid was washed with water (3 × 10 mL) and MeOH (20 mL). After drying in vacuo, the product, *i.e.* 2,2',2''-((2,4,6-Trimethylbenzene-1,3,5-triyl)tris(methylene))tris(isoindoline-1,3-dione), was employed in the second step of the procedure without further purification (4.82 g, 8.07 mmol, yield: 92%).

The obtained compound (4.82 g, 8.07 mmol) was suspended in 60 mL of toluene/MeOH mixture 2:1 (v:v), and then treated with an excess of hydrazine hydrate (3.1 mL, 50 wt% solution in water, 48.4 mmol). After two-days heating at 90°C, the mixture was concentrated in vacuo and treated with aqueous KOH (30 mL, 40 wt%). The aqueous phase was then extracted with CHCl<sub>3</sub> (3 × 50 mL). The collected organic layers were combined and dried over anhydrous Na<sub>2</sub>SO<sub>4</sub>. After concentrating in vacuo, the desired final triamine compound was collected as a white powder. The product was used without further purification (1.50 g, 7.26 mmol, yield: 90%). <sup>1</sup>H-NMR signals correspond to those reported in literature (see Figure S2). Overall yield: 83%

<sup>1</sup>H-NMR (400 MHz, CDCl<sub>3</sub>) δ: 3.86 (s, 6H, CH<sub>2</sub>N), 2.38 (s, 9H, CH<sub>3</sub>).

### 2.2 Triformylphloroglucinol<sup>S3</sup>

Phloroglucinol dihydrate (7.96 g, 49 mmol, 1 eq.) and hexamethylenetetramine (15,10 g, 108 mmol, 2.2 eq.) are dissolved in trifluoroacetic acid (90 mL) under N<sub>2</sub>. The reaction mixture is heated at 100 °C for 2.5 hours and then HCl 3M is added (150 mL). The heating at 100 °C is maintained for 1 hour and then the reaction is cooled down to room temperature. Stirring is then maintained overnight. After one night the mixture is filtered on a Celite pad and the red solution

is extracted with DCM (4 x 100 mL). The reunited organic phases are dried over Na<sub>2</sub>SO<sub>4</sub>, filtered and the solvent is removed under vacuum to obtain 1.05 g of a brownish-red solid. The product was used without further purification. Yield: 10.2 %. <sup>1</sup>H-NMR signals correspond to those reported in literature (see Figure S3).

<sup>1</sup>H-NMR (400 MHz, CDCl<sub>3</sub>) δ: 14.17 (s, 3H, CHO), 10.18 (s, 3H, OH).

### 2.3 <sup>1</sup>H-NMR characterization of EtNH<sub>2</sub>, MeNH<sub>2</sub>, TFP

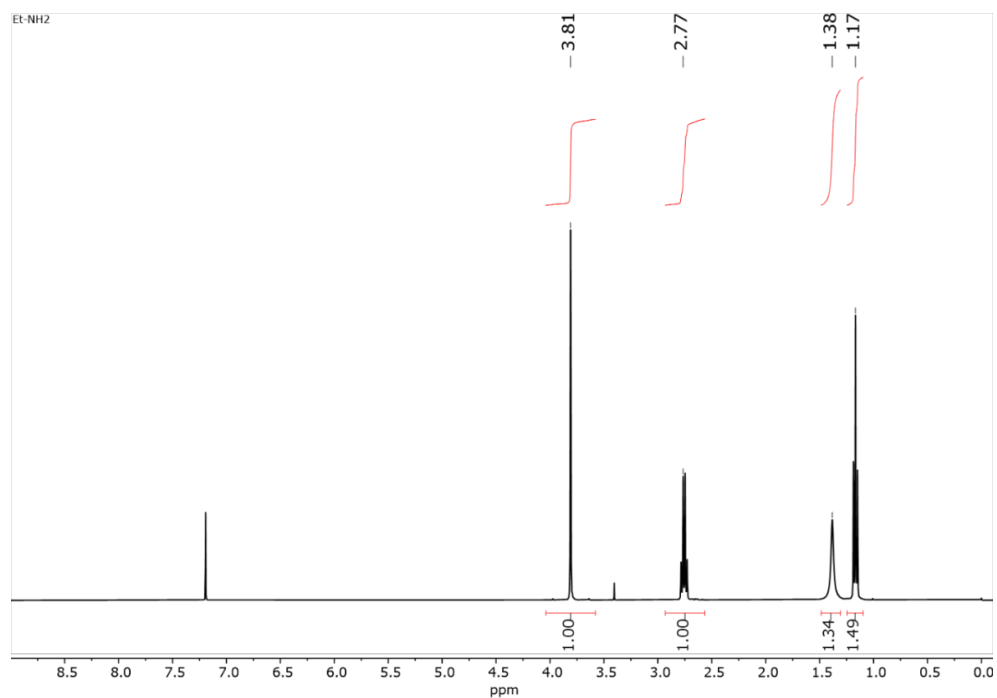

**Figure S1.** <sup>1</sup>H-NMR (CDCl<sub>3</sub>) spectrum of EtNH<sub>2</sub>

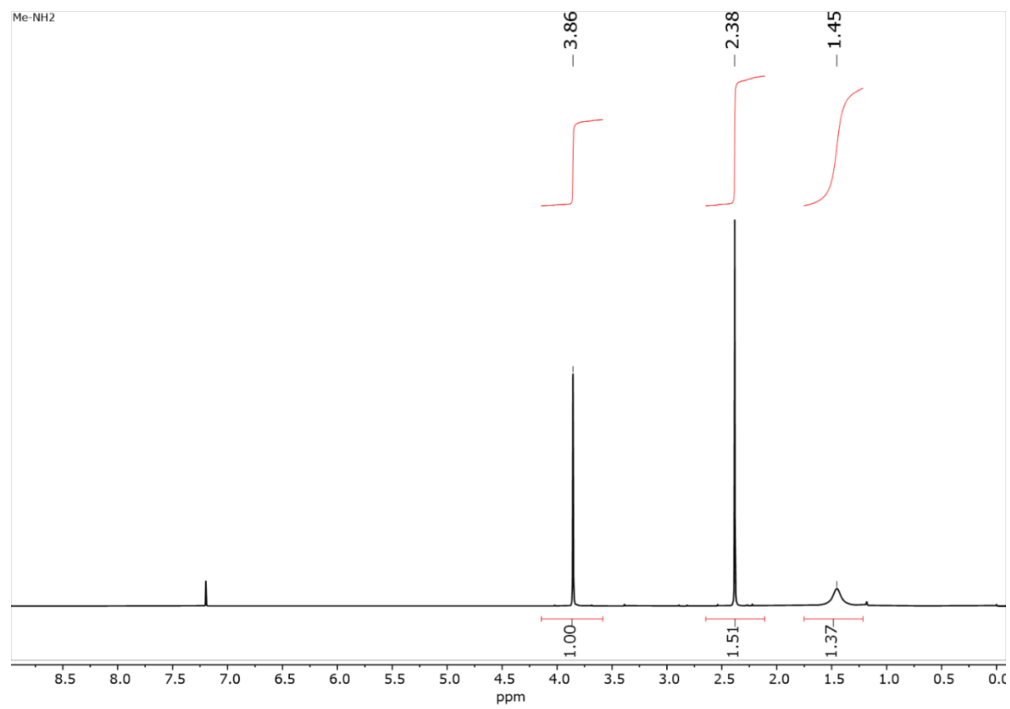

**Figure S2.** <sup>1</sup>H-NMR (CDCl<sub>3</sub>) spectrum of MeNH<sub>2</sub>

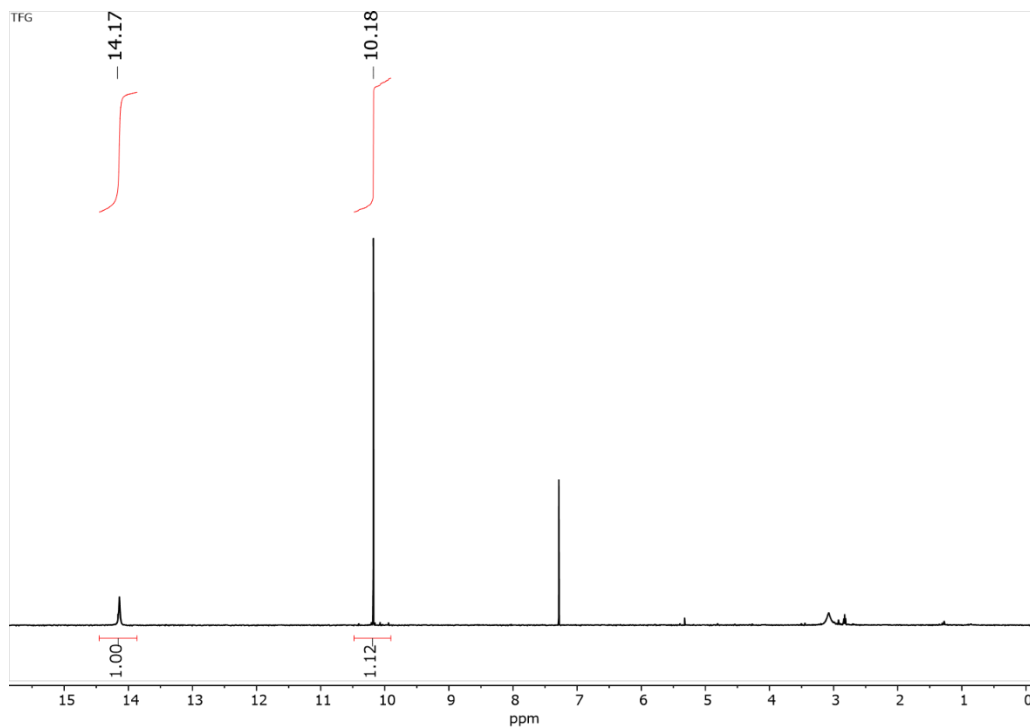

**Figure S3.** <sup>1</sup>H-NMR (CDCl<sub>3</sub>) spectrum of TFP

### 3. Physicochemical characterization of POPs

#### 3.1 Elemental Analysis

**Table S1.** Elemental Analysis of POPs. The theoretical percentages are shown in brackets.

| Sample   | Weight (mg) | C %           | H %          | N %           | S (%)* | C/N atoms |
|----------|-------------|---------------|--------------|---------------|--------|-----------|
| POP-W-Et | 2.27        | 67.58 (71.10) | 7.093 (6.71) | 10.47 (10.36) | 0.124  | 7.6 (8)   |
| POP-W-Me | 2.21        | 66.66 (69.40) | 6.566 (5.83) | 11.65 (11.57) | 0.017  | 6.7 (7)   |
| POP-O-Et | 3.68        | 63.46 (71.10) | 6.037 (6.71) | 8.80 (10.36)  | 0.098  | 8.4 (8)   |
| POP-O-Me | 2.13        | 66.05 (69.40) | 6.202 (5.83) | 10.4 (11.57)  | 0.103  | 7.4 (7)   |

\* the sulfur contained in the polymer samples is attributable to an impurity derived from the starting materials.

#### 3.2 Thermogravimetric Analysis

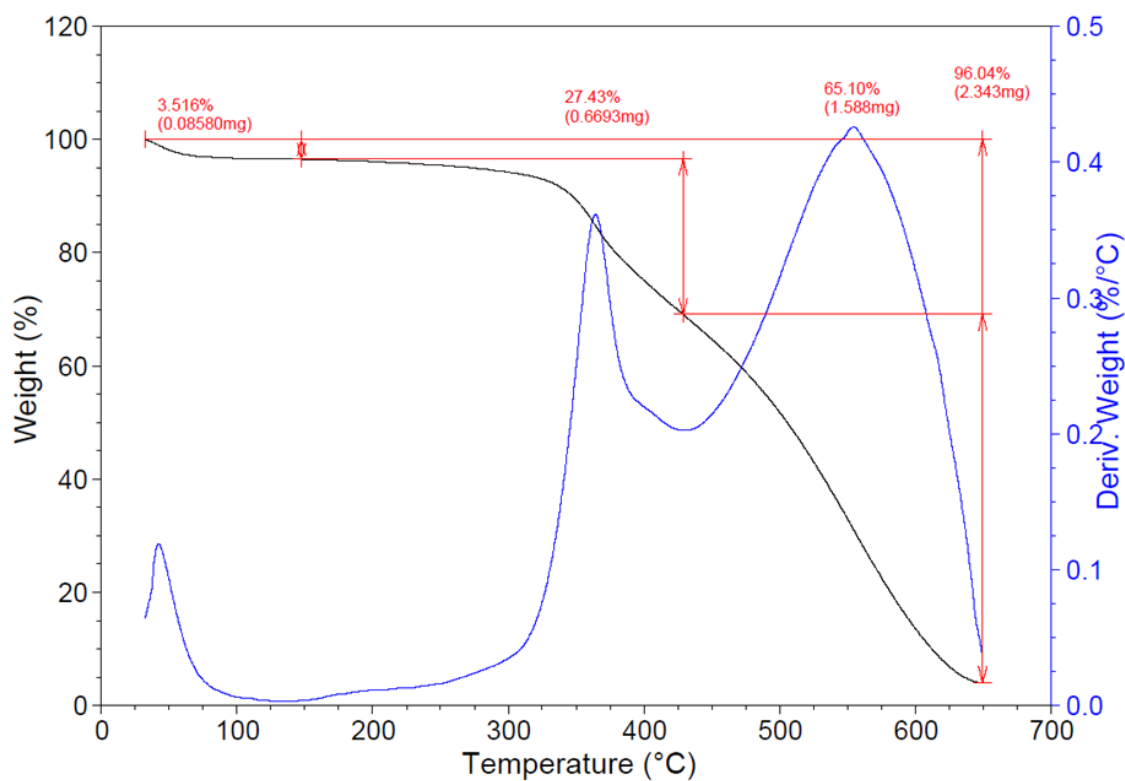

**Figure S4** TGA-DTG curves for POP-W-Et



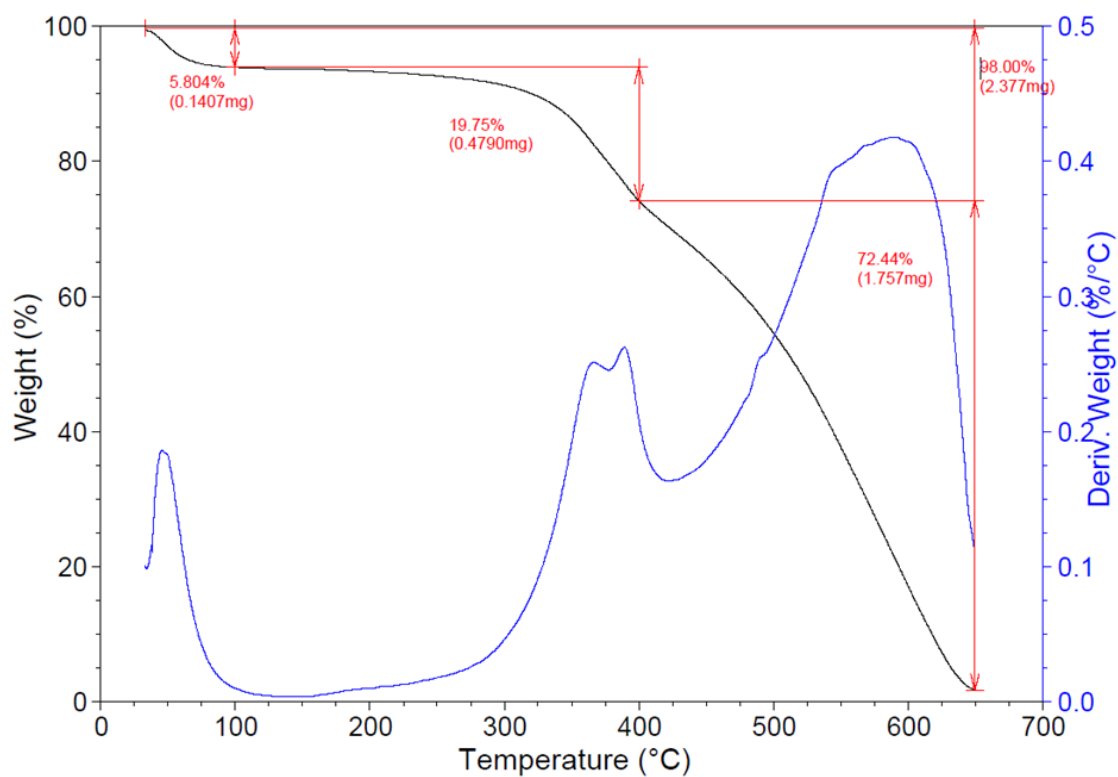

**Figure S5** TGA-DTG curves for POP-O-Et

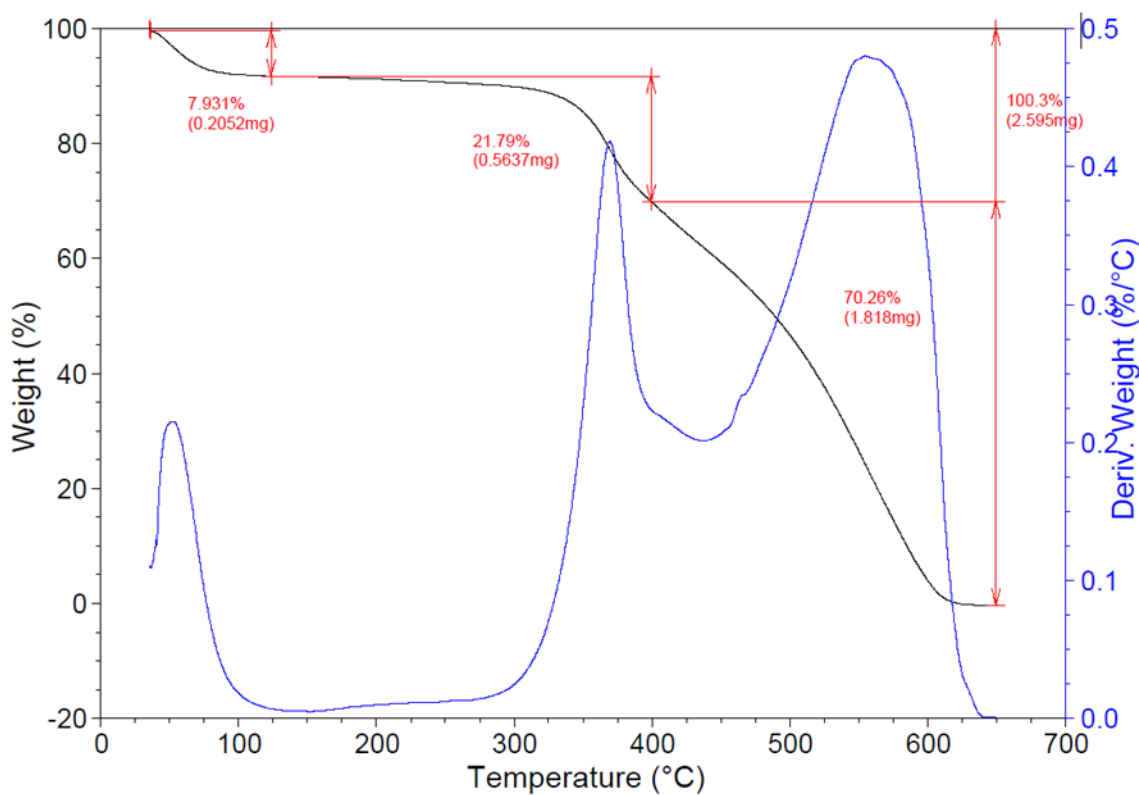

**Figure S6** TGA-DTG curves for POP-W-Me

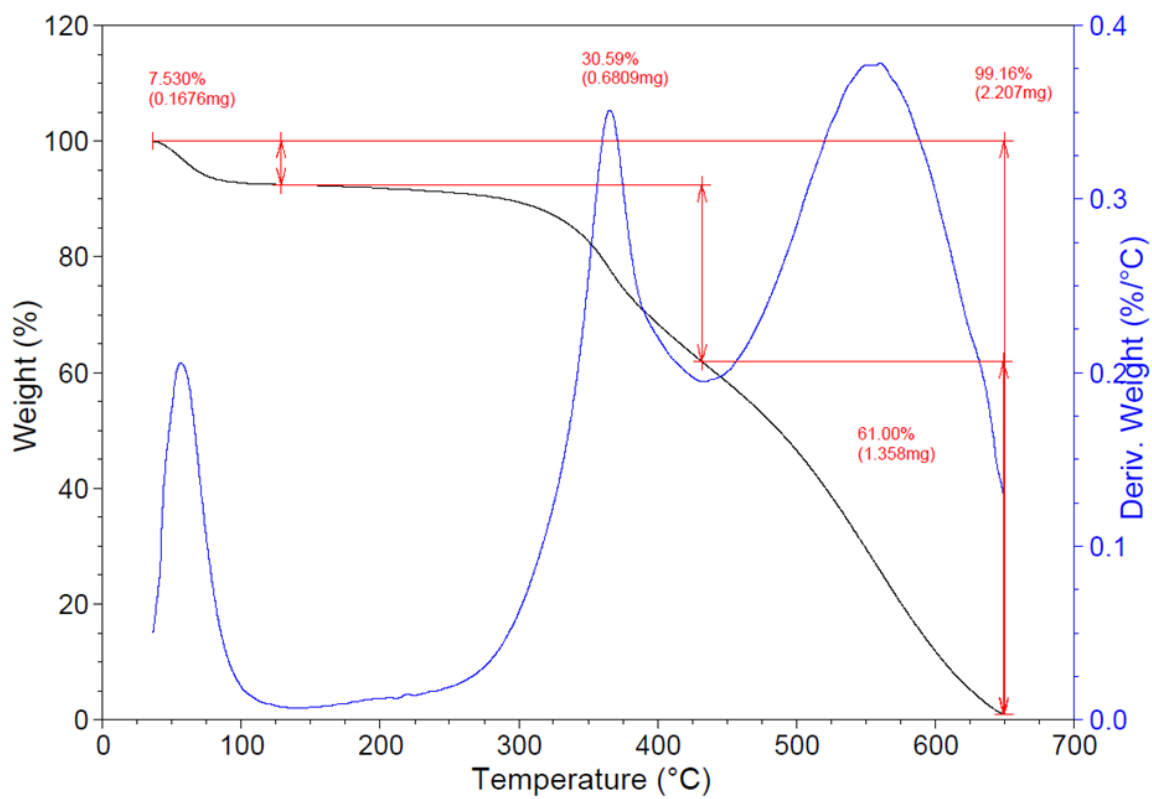

**Figure S7** TGA-DTG curves for POP-O-Me

### 3.3 Differential Scanning Calorimetry Analysis

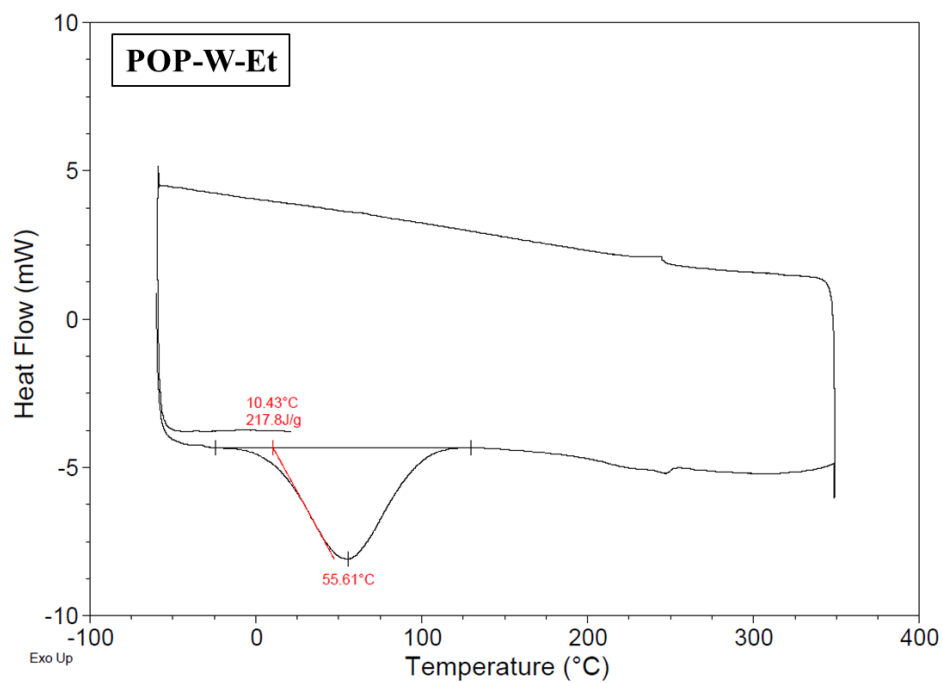

Figure S8 DSC for POP-W-Et

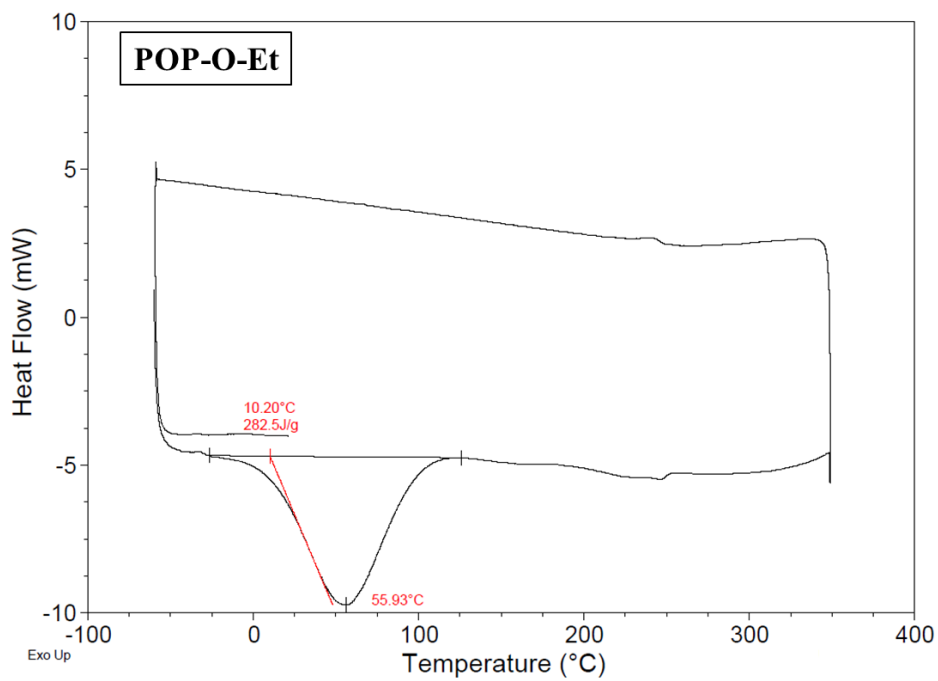

Figure S9 DSC for POP-O-Et

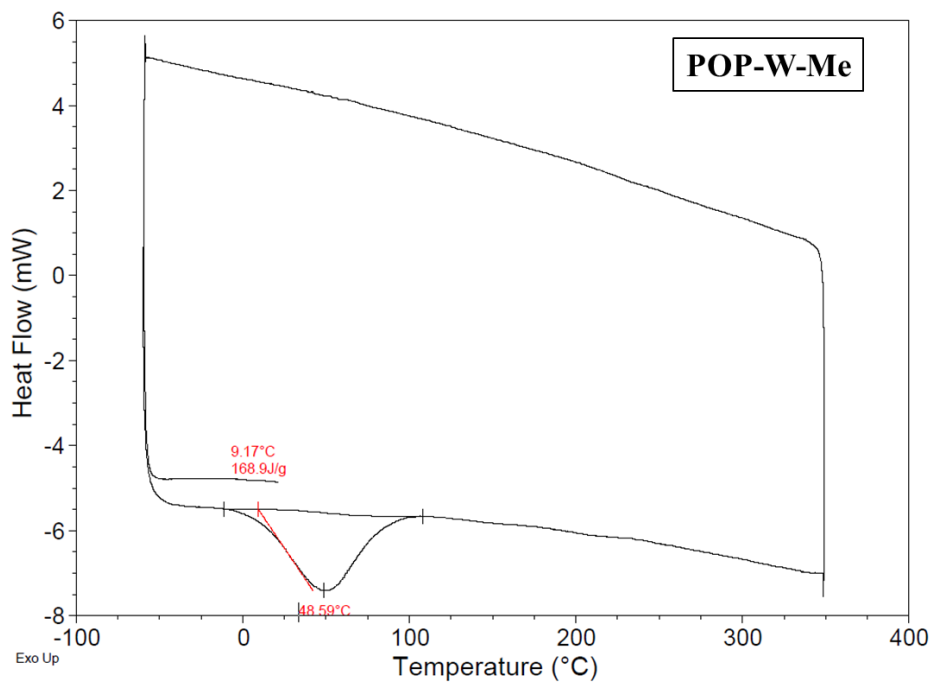

**Figure S10** DSC for POP-W-Me

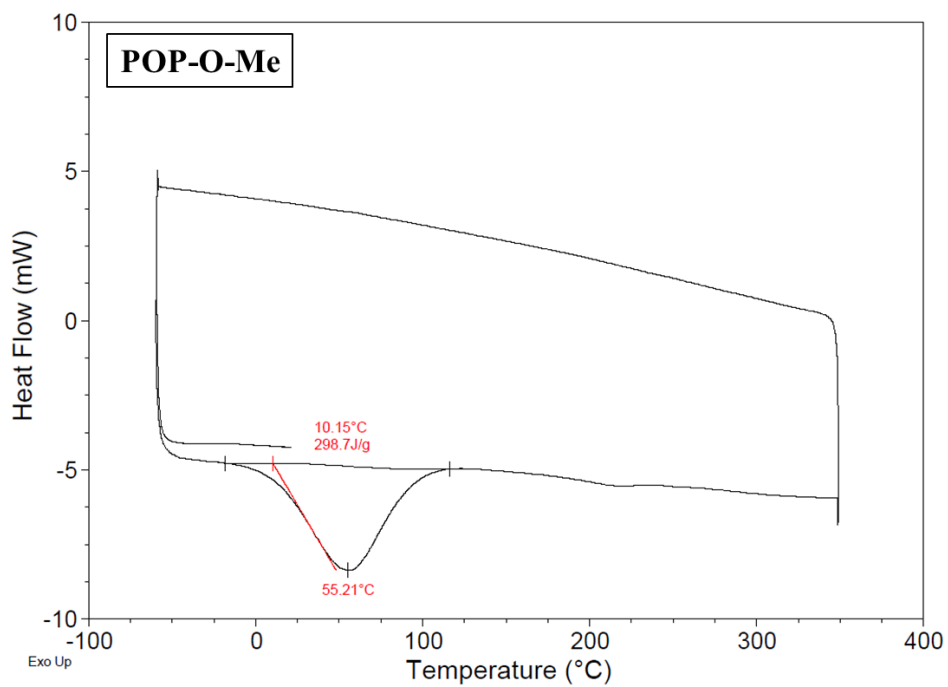

**Figure S11** DSC for POP-O-Me

### 3.4 FT-IR Analysis

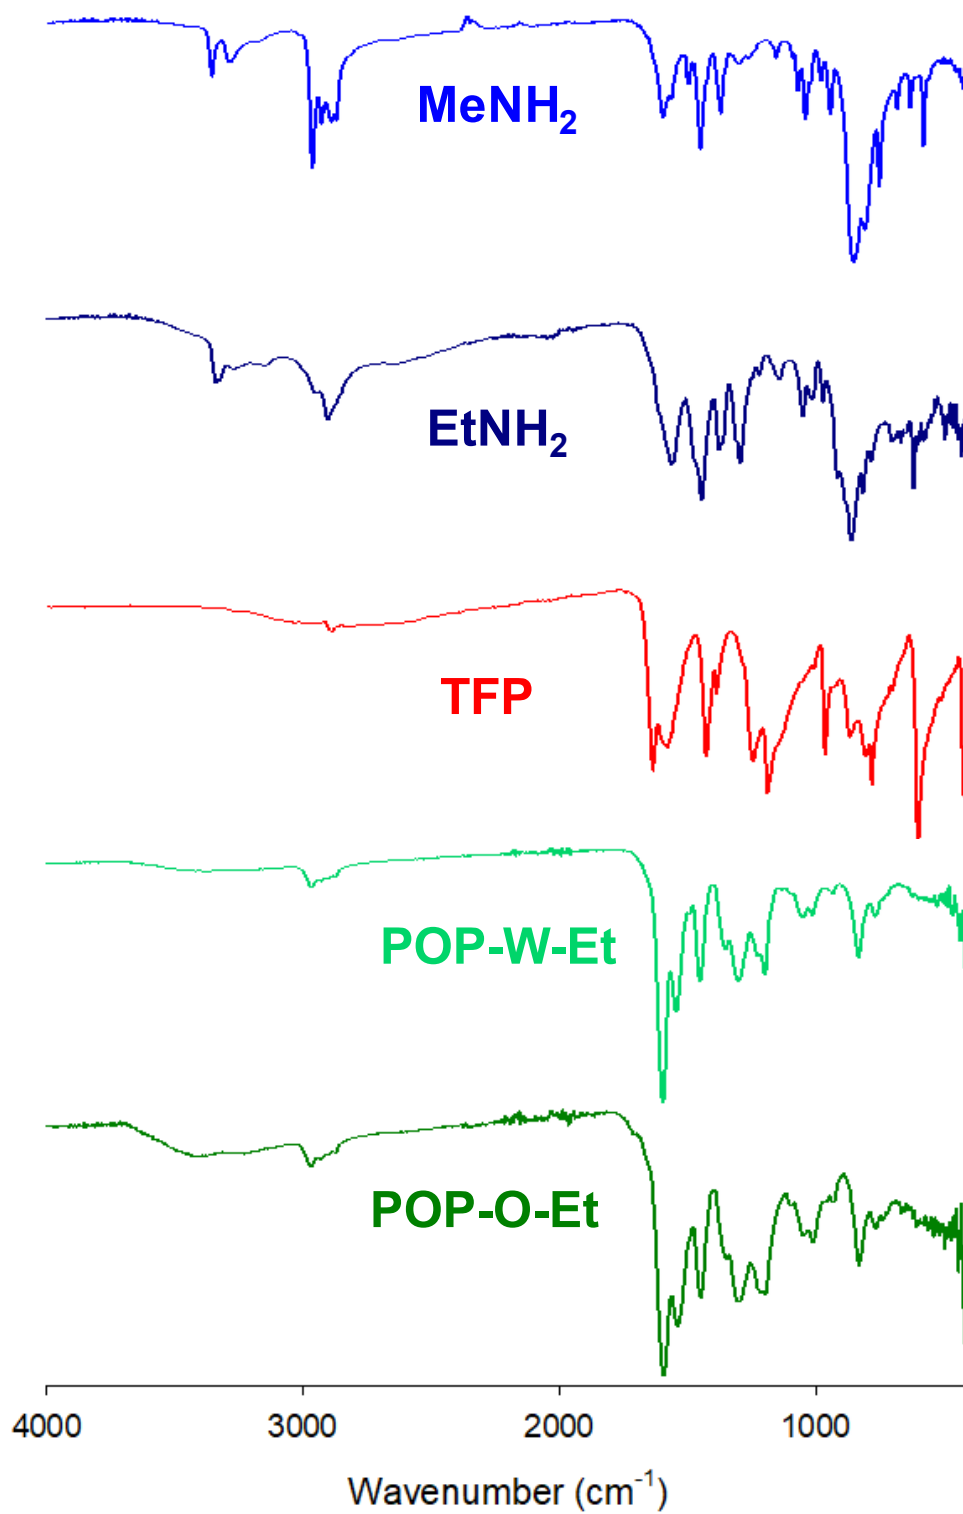

**Figure S12.** FT-IR spectra of POP-W/O-Et materials and precursors.

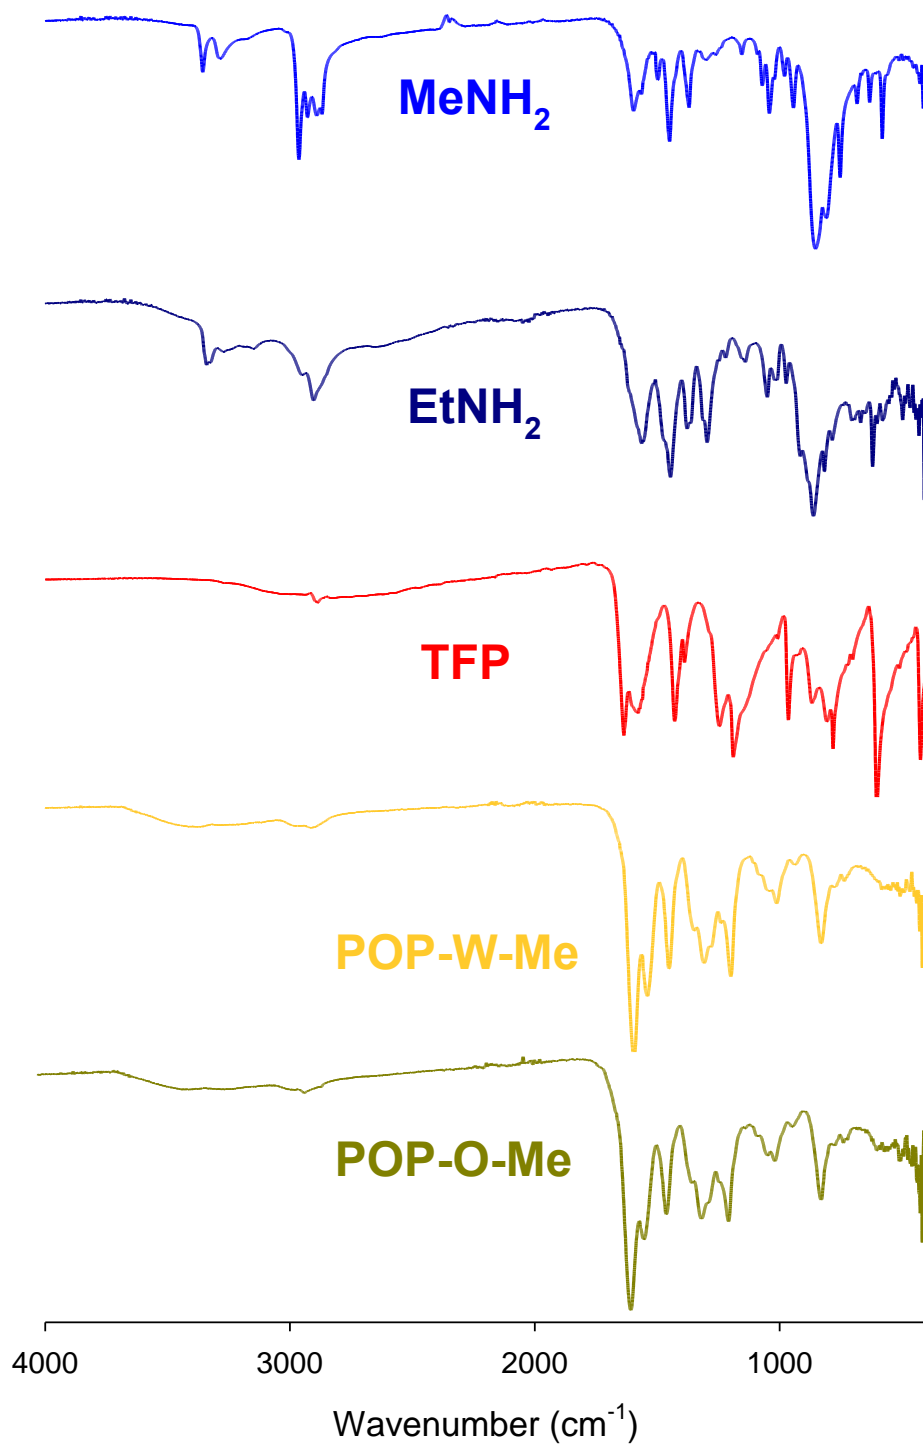

**Figure S13.** FT-IR spectra of POP-W/O-Me materials and precursors.

### 3.5 Solid-State NMR

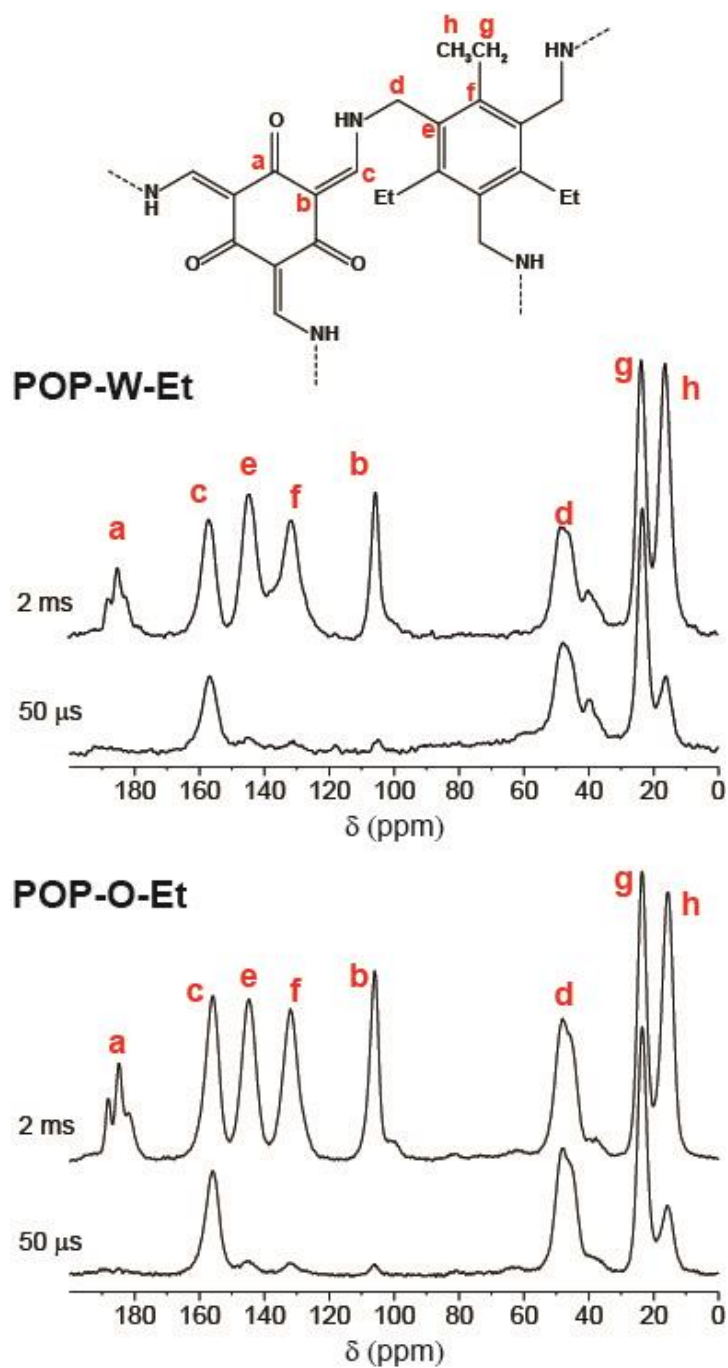

**Figure S14.**  $^{13}\text{C}\{^1\text{H}\}$  CP MAS spectra of **POP-W-Et** and **POP-O-Et** (up and down, respectively) materials performed at 298 K at a spinning speed of 12.5 kHz with contact times of 2 ms and 50  $\mu\text{s}$ . (The samples were treated under high vacuum at 80  $^\circ\text{C}$  for 12 hours before the NMR measurements).

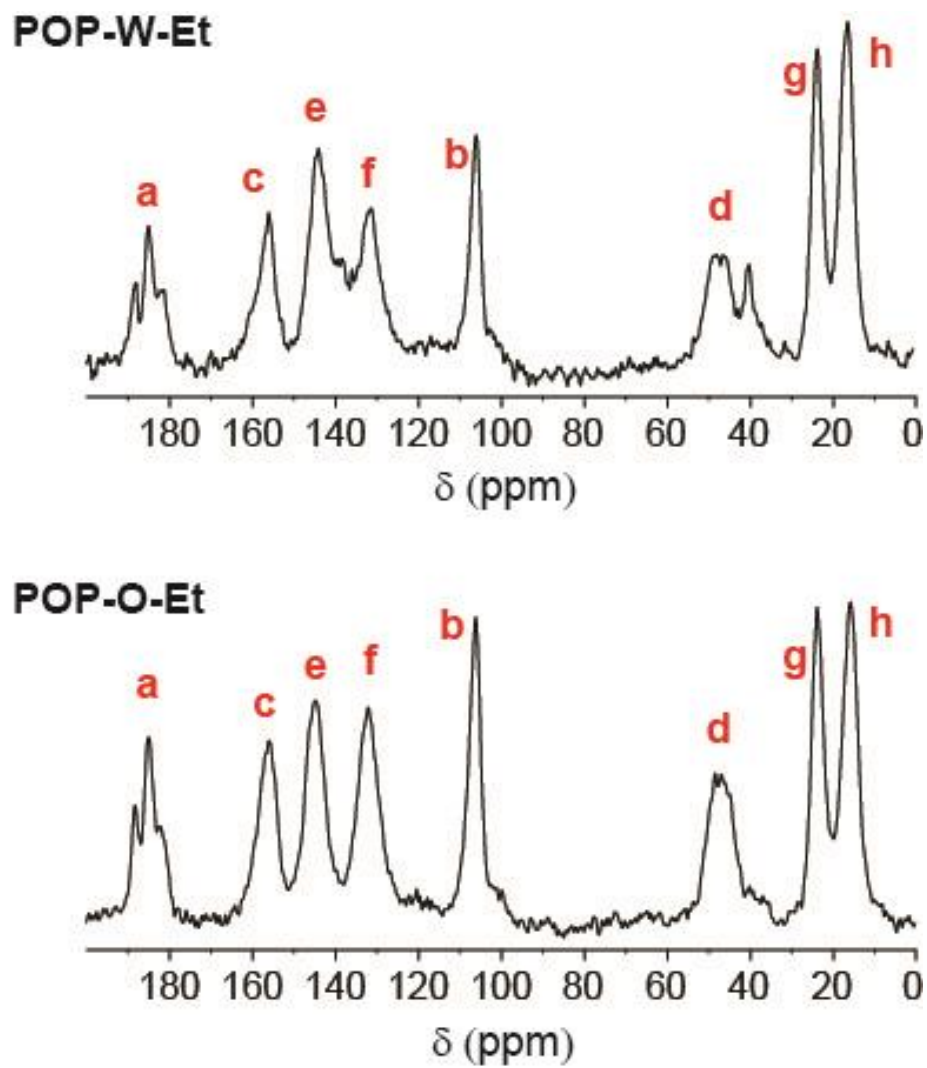

**Figure S15**  $^{13}\text{C}\{^1\text{H}\}$  SPE MAS spectra of **POP-W-Et** and **POP-O-Et** (up and down, respectively) materials performed at 298 K at a spinning speed of 12.5 kHz with recycle delay of 60 s.



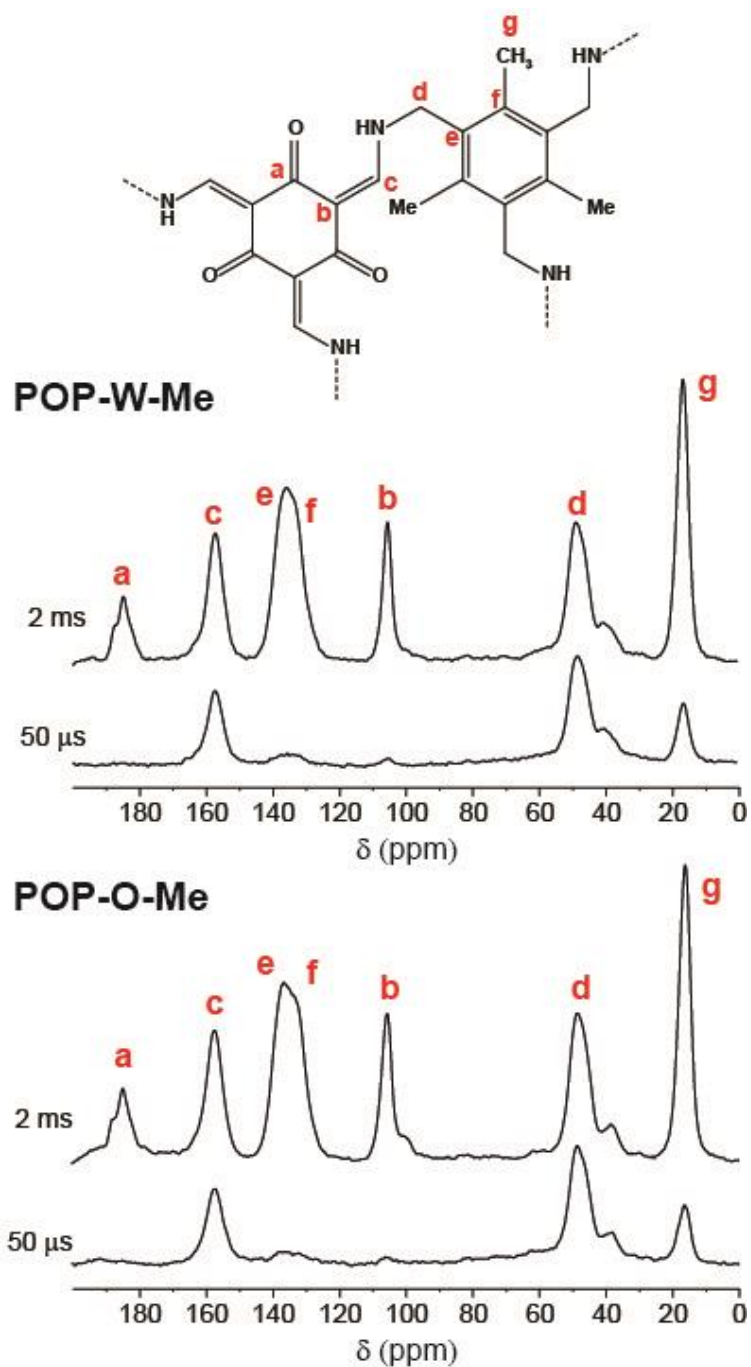

**Figure S16.**  $^{13}\text{C}\{^1\text{H}\}$  CP MAS spectra of **POP-W-Me** and **POP-O-Me** (up and down, respectively) materials performed at 298 K at a spinning speed of 12.5 kHz with contact times of 2 ms and 50  $\mu\text{s}$ . (The samples were treated under high vacuum at 80  $^\circ\text{C}$  for 12 hours before the NMR measurements).

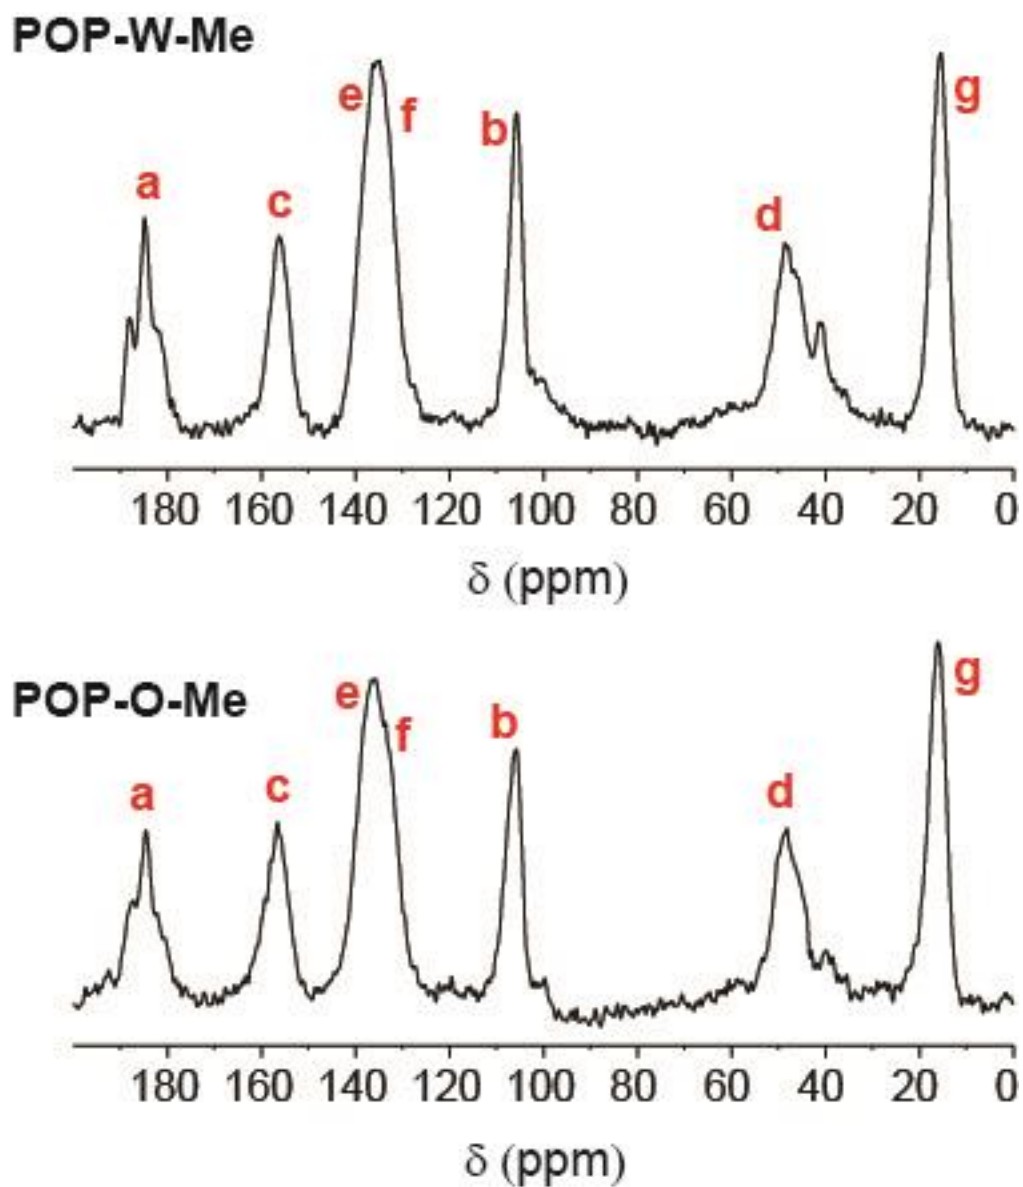

**Figure S17.**  $^{13}\text{C}\{^1\text{H}\}$  SPE MAS spectra of **POP-W-Me** and **POP-O-Me** (up and down, respectively) materials performed at 298 K at a spinning speed of 12.5 kHz with recycle delay of 60 s.

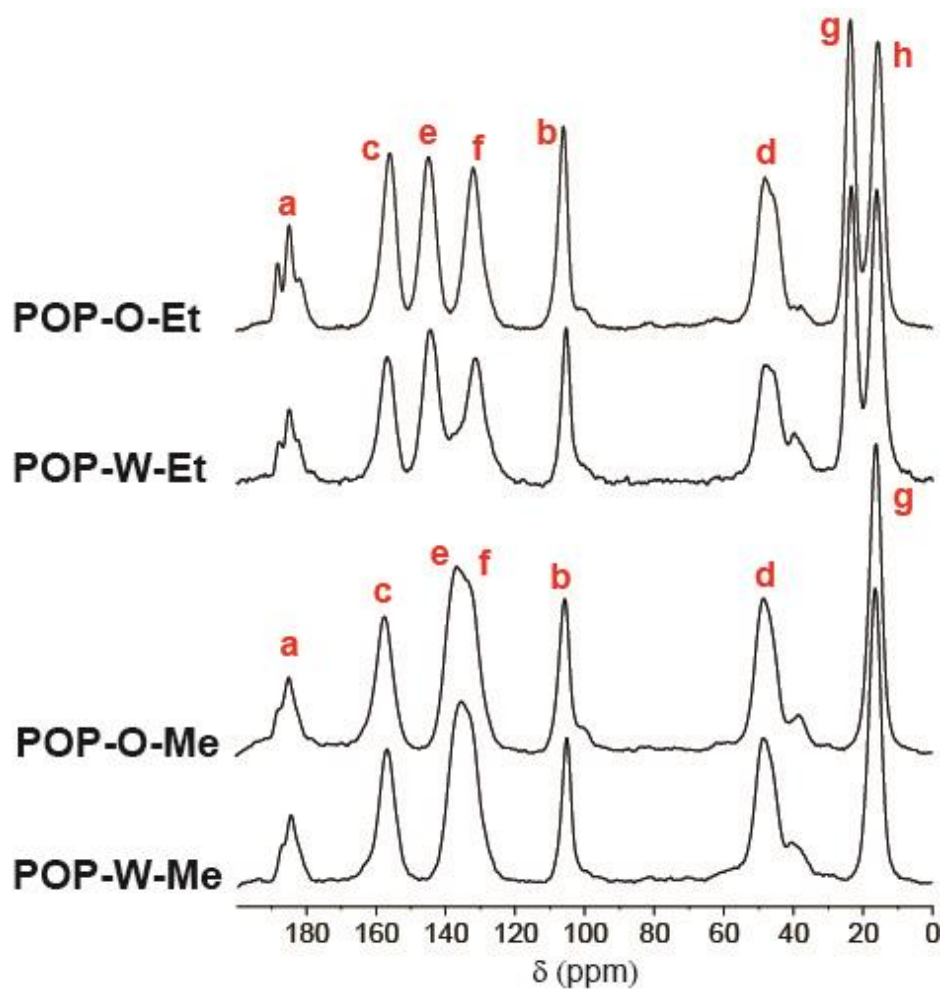

**Figure S18.**  $^{13}\text{C}\{^1\text{H}\}$  CPMAS spectra of materials performed at 298 K at a spinning speed of 12.5 kHz with contact times of 2 ms.

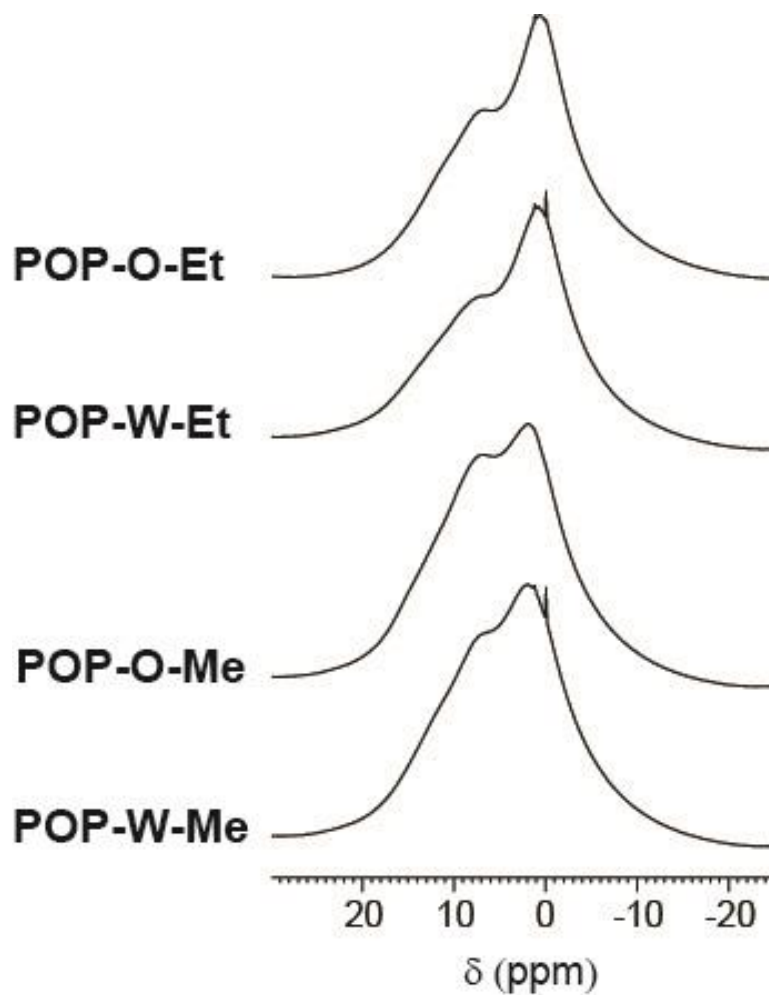

**Figure S19.**  $^1\text{H}$ -MAS spectra of materials performed at 298 K at a spinning speed of 12.5 kHz with a recycle delay of 20 s.

**Table S2.**  $^{13}\text{C}$  chemical shifts from  $^{13}\text{C}\{^1\text{H}\}$  CP MAS spectra collected at 7.04 T and 298 K.

| <b>POP-O-Et</b>                                                                     | <b>Assignment</b>    | <b><math>\delta</math> (ppm)</b> |
|-------------------------------------------------------------------------------------|----------------------|----------------------------------|
| 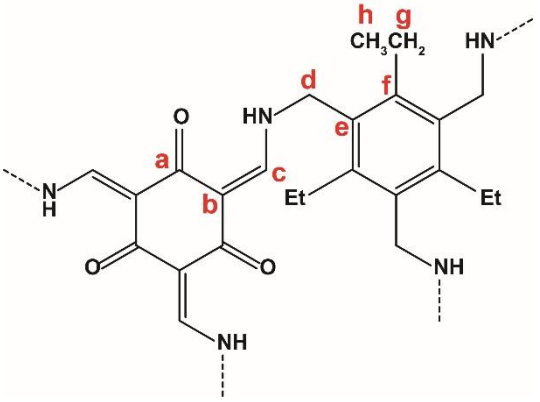   | <b>C<sub>a</sub></b> | 188.1<br>184.8<br>181.9          |
|                                                                                     | <b>C<sub>b</sub></b> | 105.9                            |
|                                                                                     | <b>C<sub>c</sub></b> | 155.8                            |
|                                                                                     | <b>C<sub>d</sub></b> | 48.0 (45.9)                      |
|                                                                                     | <b>C<sub>e</sub></b> | 144.7                            |
|                                                                                     | <b>C<sub>f</sub></b> | 131.9                            |
|                                                                                     | <b>C<sub>g</sub></b> | 23.5                             |
|                                                                                     | <b>C<sub>h</sub></b> | 15.6                             |
| <b>POP-W-Et</b>                                                                     | <b>Assignment</b>    | <b><math>\delta</math> (ppm)</b> |
|  | <b>C<sub>a</sub></b> | 188.0<br>184.9<br>182.5          |
|                                                                                     | <b>C<sub>b</sub></b> | 105.4                            |
|                                                                                     | <b>C<sub>c</sub></b> | 156.8                            |
|                                                                                     | <b>C<sub>d</sub></b> | 48.4 (47.5)                      |
|                                                                                     | <b>C<sub>e</sub></b> | 144.3                            |
|                                                                                     | <b>C<sub>f</sub></b> | 131.3                            |
|                                                                                     | <b>C<sub>g</sub></b> | 23.4                             |
|                                                                                     | <b>C<sub>h</sub></b> | 16.1                             |

| POP-O-Me | Assignment             | $\delta$ (ppm)  |
|----------|------------------------|-----------------|
|          | <b>C<sub>a</sub></b>   | 187.9<br>184.6  |
|          | <b>C<sub>b</sub></b>   | 105.5           |
|          | <b>C<sub>c</sub></b>   | 157.2           |
|          | <b>C<sub>d</sub></b>   | 48.5            |
|          | <b>C<sub>e-f</sub></b> | 136.5–<br>133.2 |
|          | <b>C<sub>g</sub></b>   | 16.2            |
| POP-W-Me | Assignment             | $\delta$ (ppm)  |
|          | <b>C<sub>a</sub></b>   | 187.6<br>184.8  |
|          | <b>C<sub>b</sub></b>   | 105.3           |
|          | <b>C<sub>c</sub></b>   | 157.1           |
|          | <b>C<sub>d</sub></b>   | 48.6            |
|          | <b>C<sub>e-f</sub></b> | 135.7           |
|          | <b>C<sub>g</sub></b>   | 16.3            |

### 3.6 Powder X-Ray Diffraction Analysis

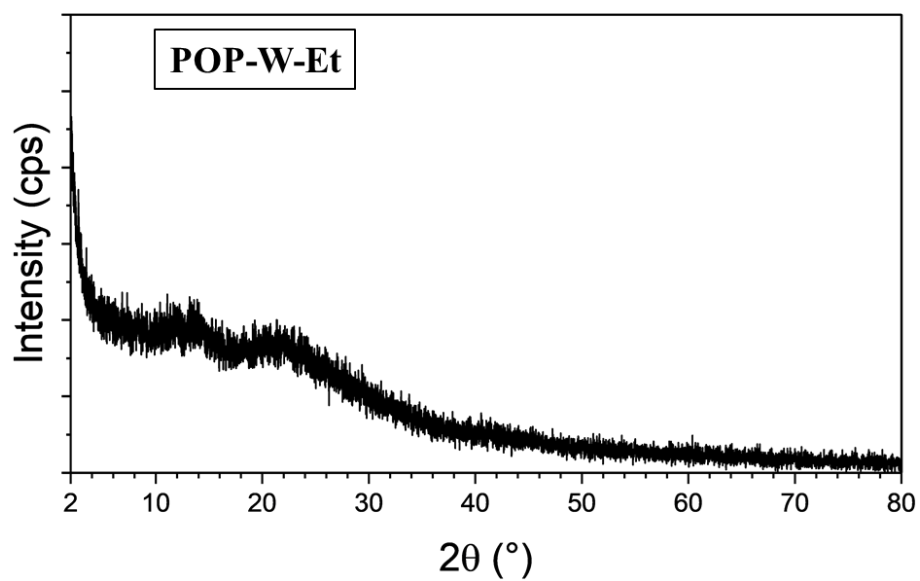

Figure S20 PXR of POP-W-Et

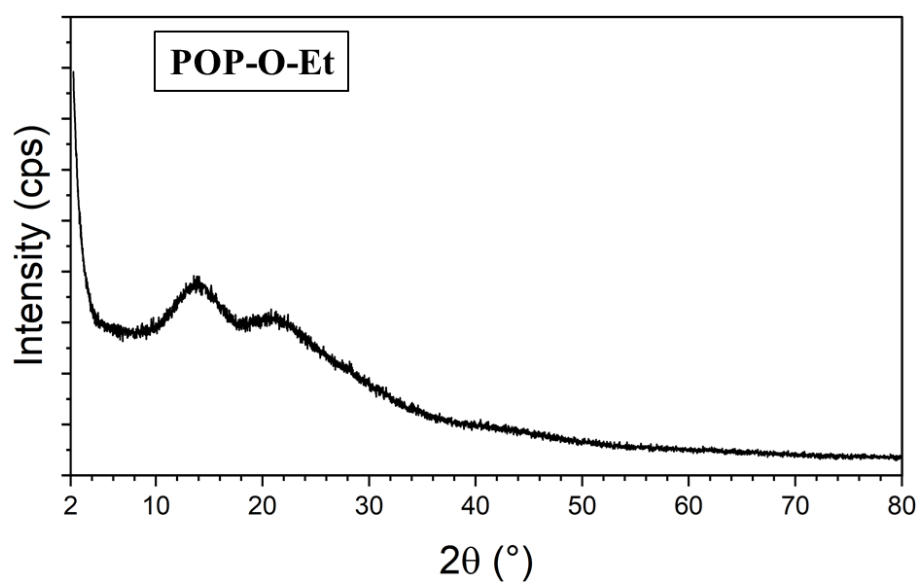

Figure S21 PXR of POP-O-Et

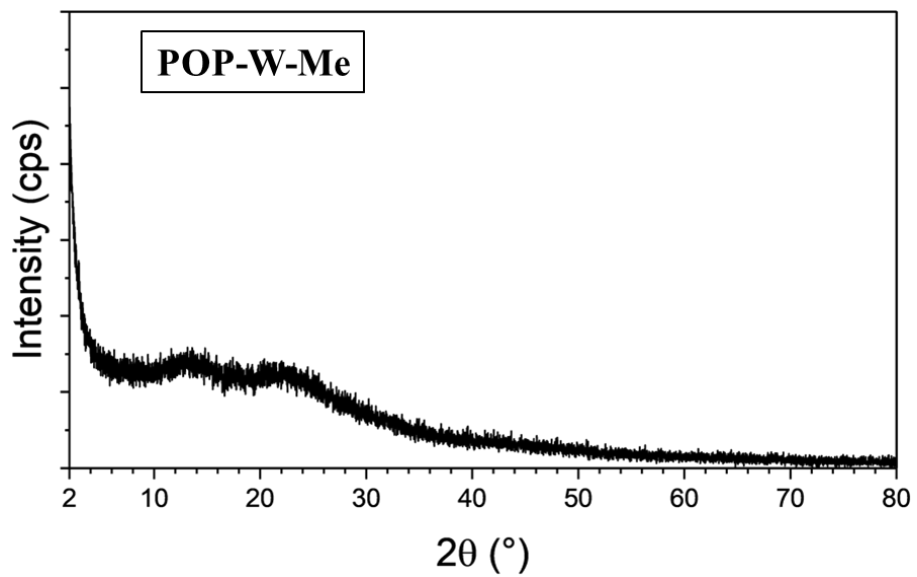

Figure S22 PXR D of POP-W-Me

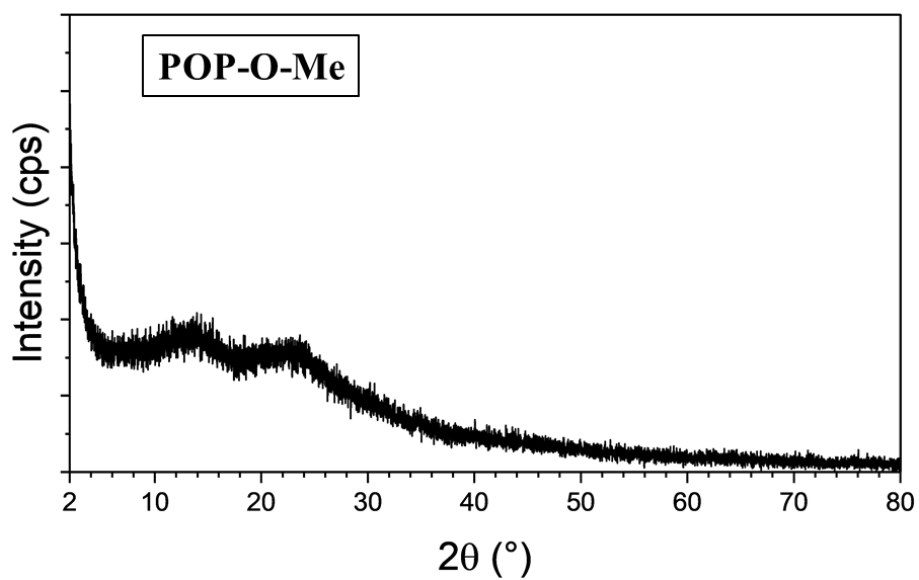

Figure S23 PXR D of POP-O-Me



### 3.7 Scanning Electron Microscopy Images

#### POP-W-Me

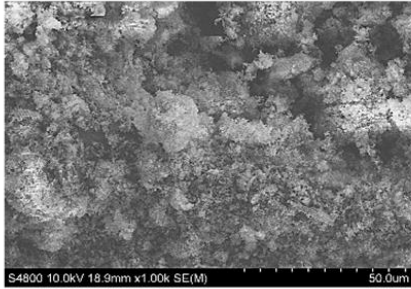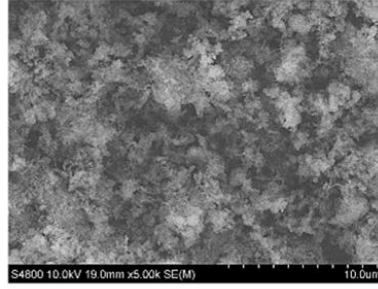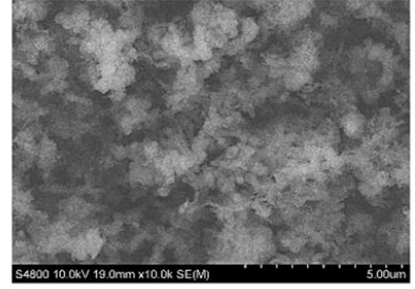

#### POP-O-Me

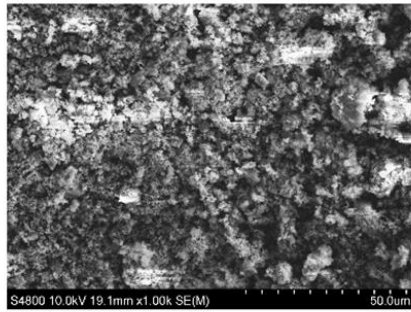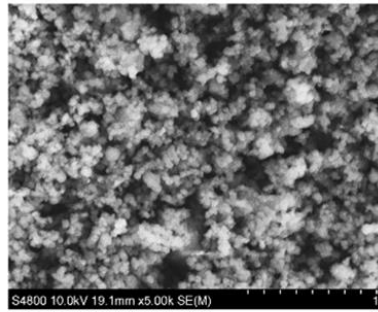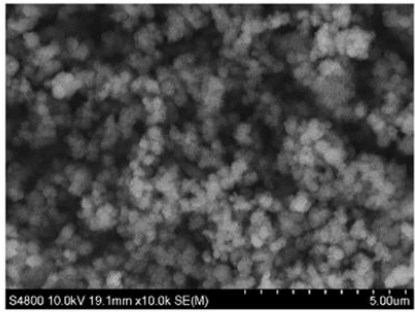

**Figure S24** SEM pictures of POP-W-Me and POP-O-Me at different magnifications

## POP-W-Et

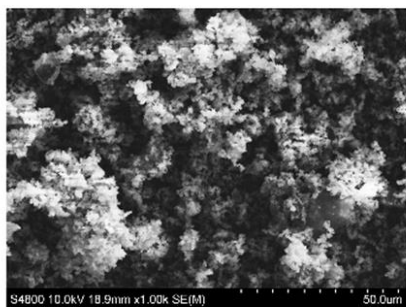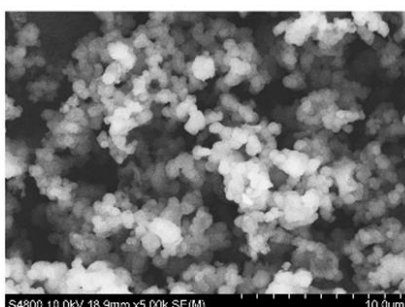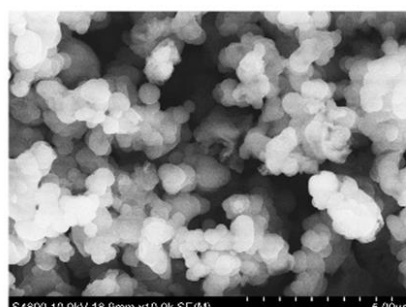

## POP-O-Et

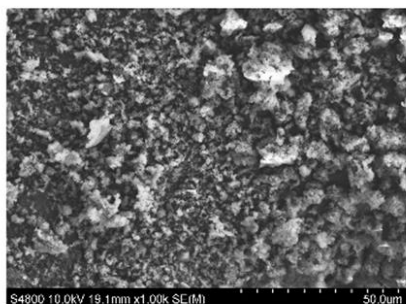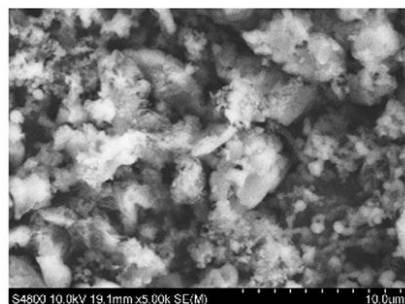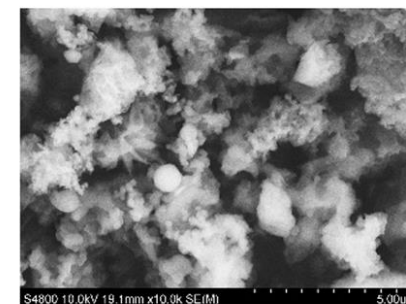

**Figure S25** SEM pictures of POP-W-Et and POP-O-Et at different magnifications

#### 4. Gas adsorption studies

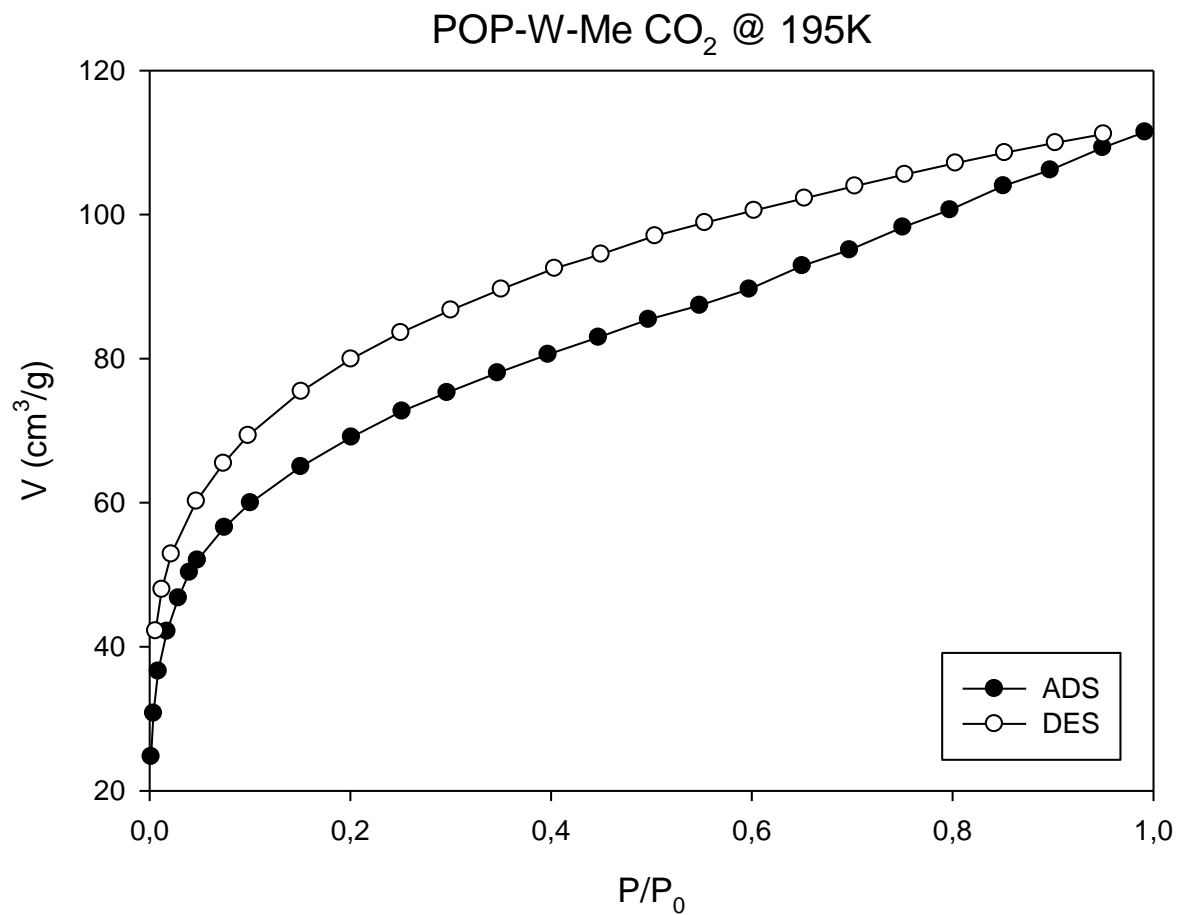

Figure S26 CO<sub>2</sub> Adsorption-Desorption curve of POP-W-Me at 195 K.

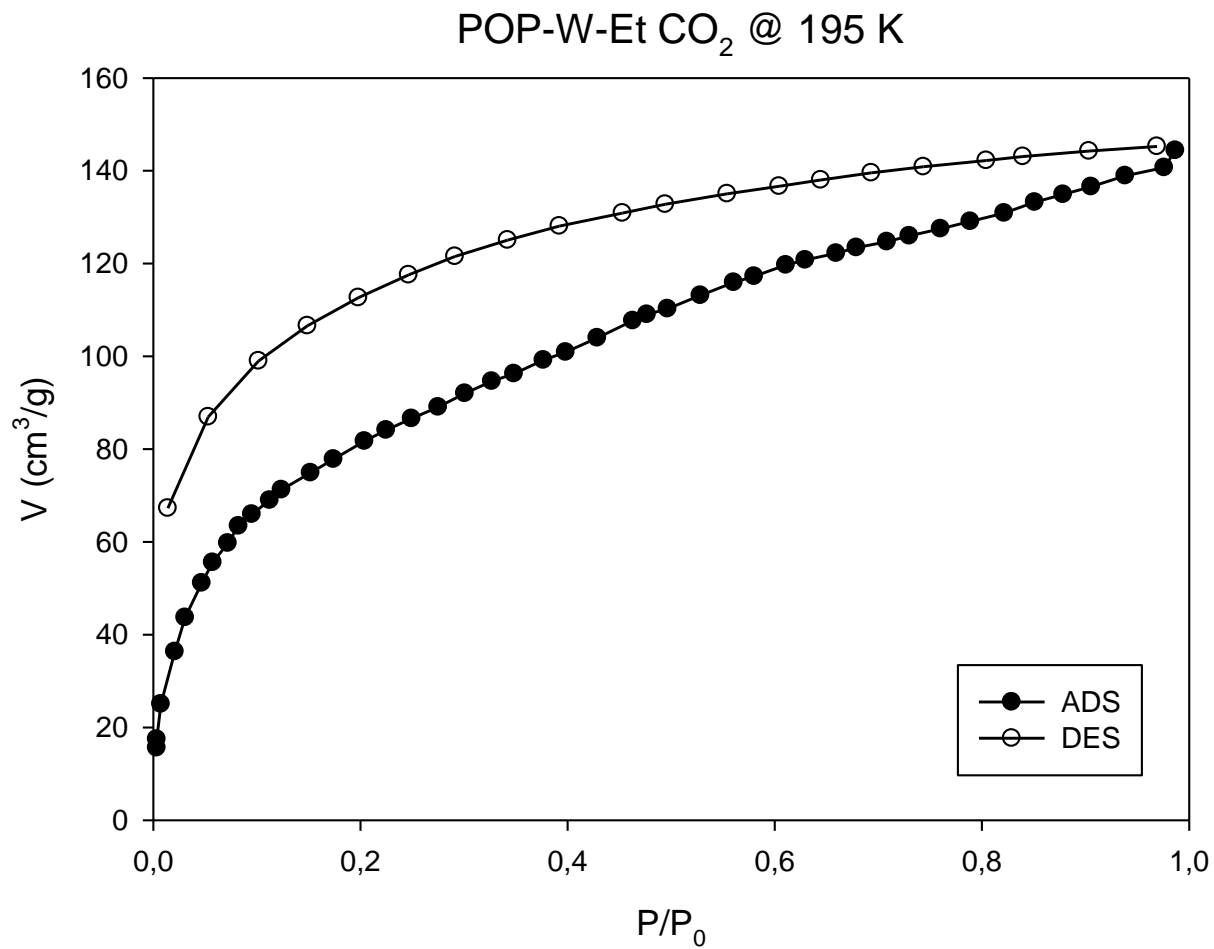

**Figure S27** CO<sub>2</sub> Adsorption-Desorption curve of POP-W-Et at 195 K.

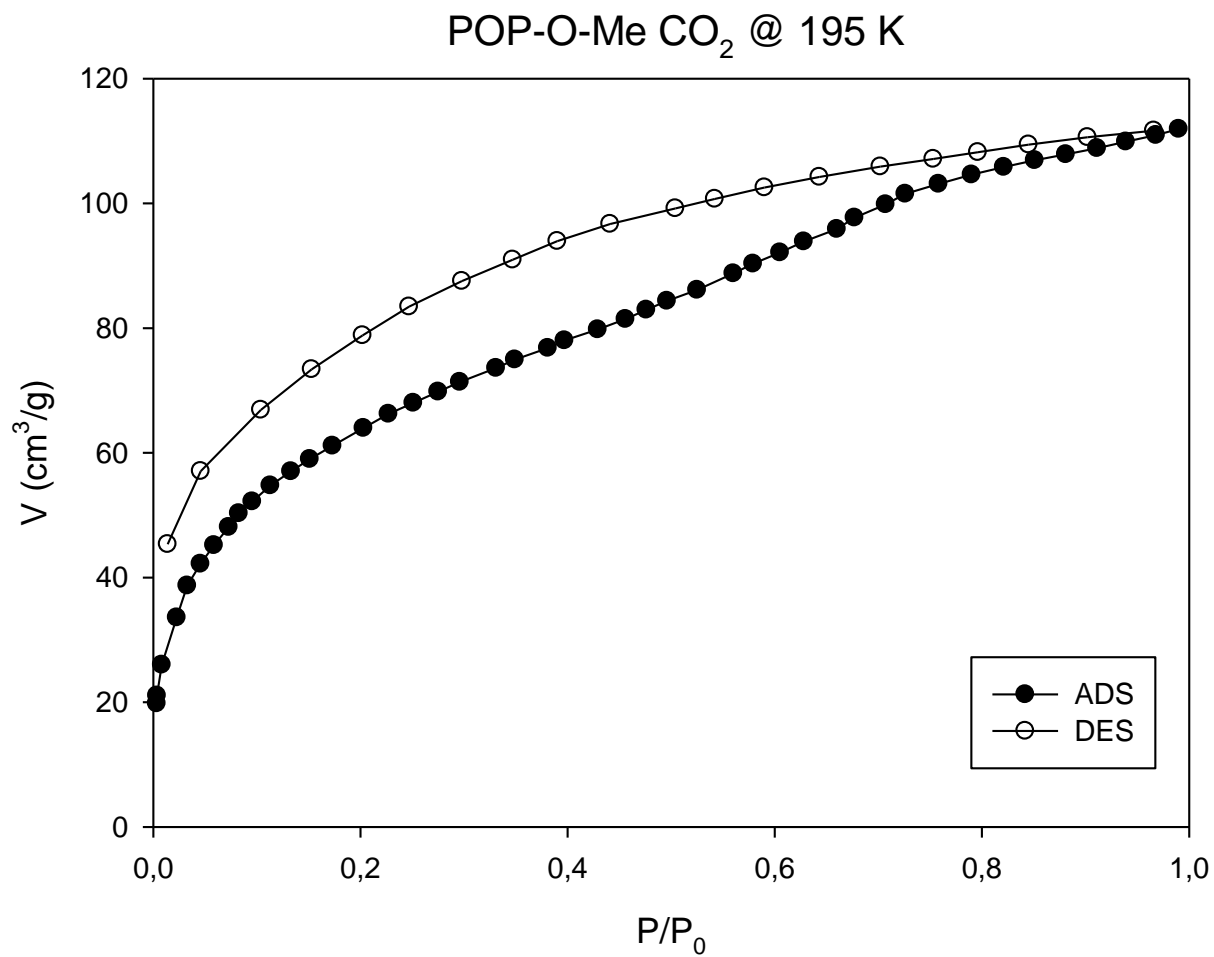

**Figure S28** CO<sub>2</sub> Adsorption-Desorption curve of POP-O-Me at 195 K.

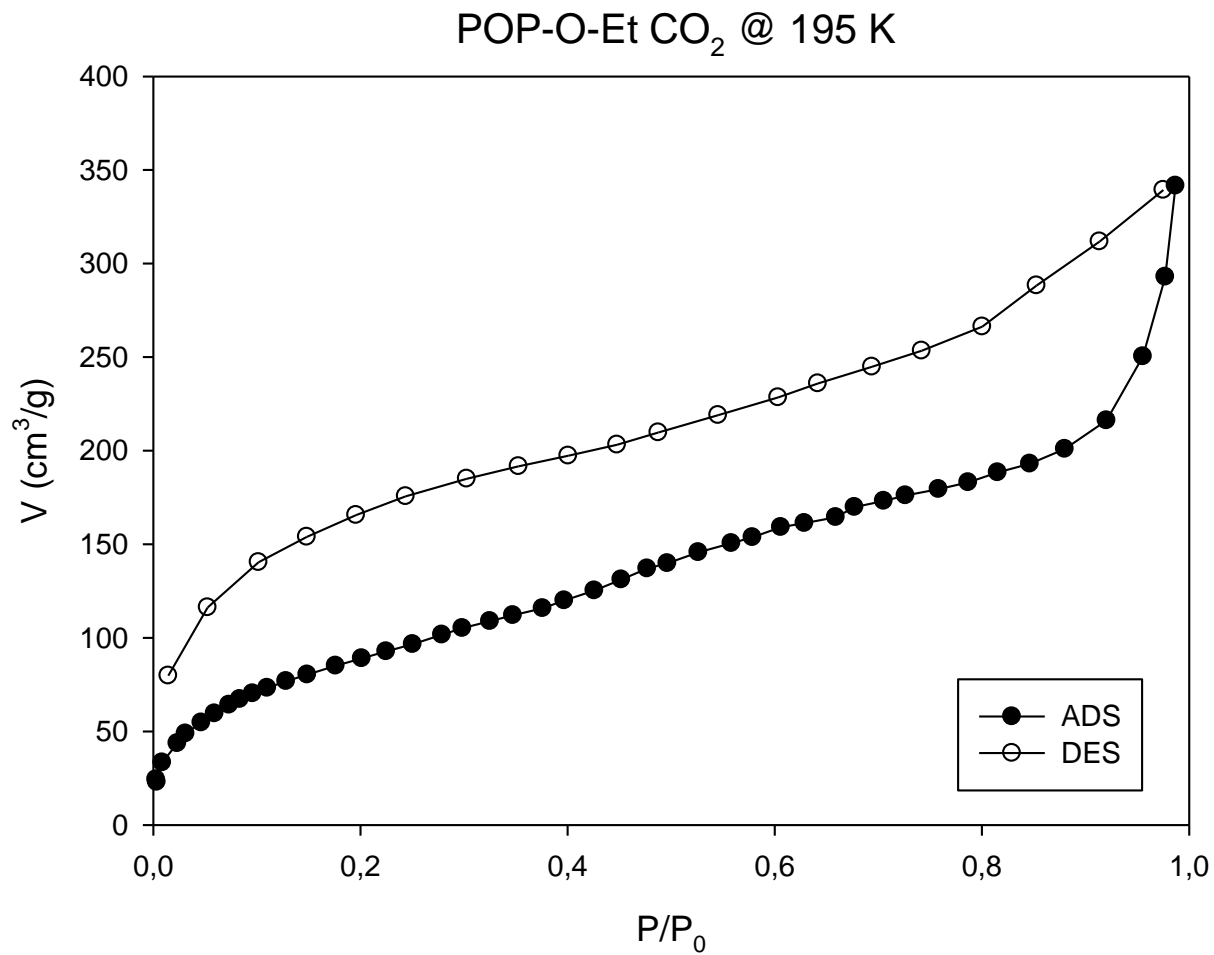

**Figure S29** CO<sub>2</sub> Adsorption-Desorption curve of POP-O-Et at 195 K.

POP-W-Me CO<sub>2</sub> @ 273 K

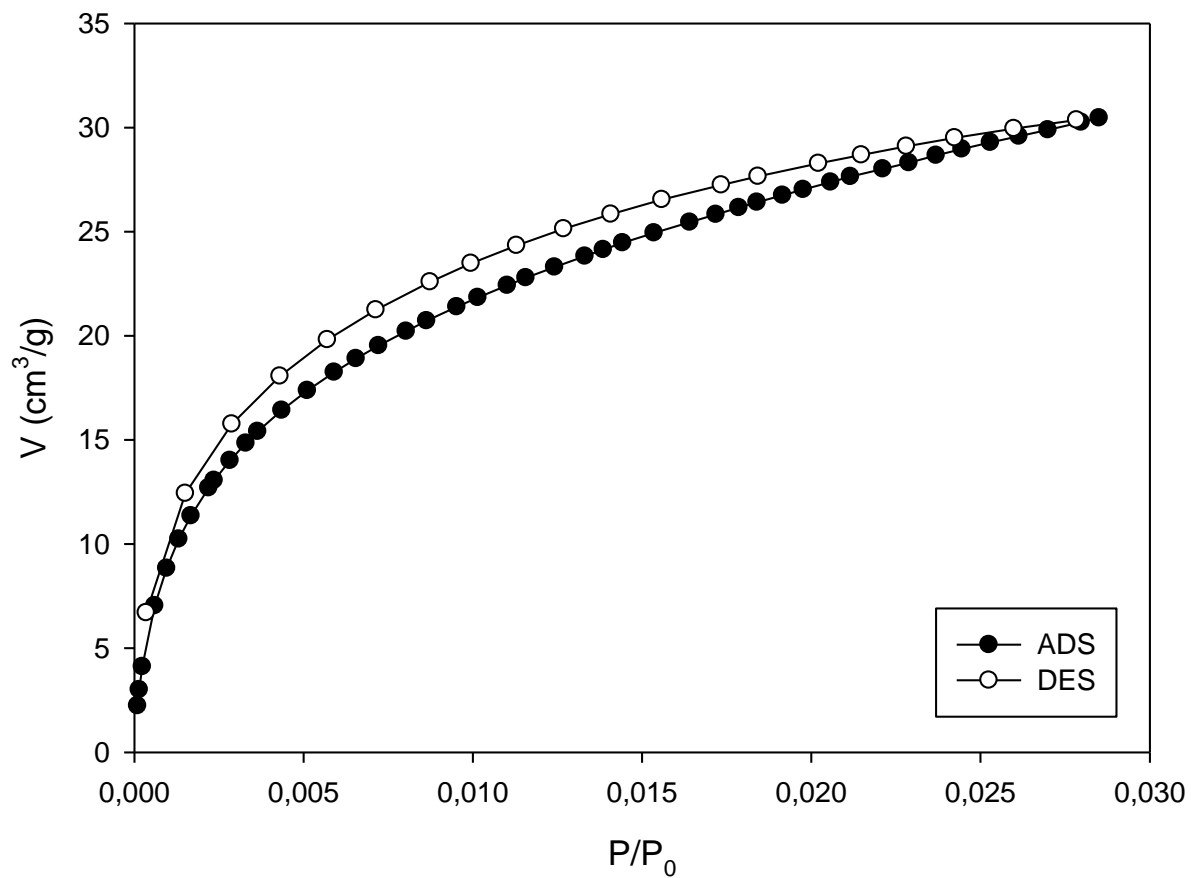

Figure S30 CO<sub>2</sub> Adsorption-Desorption curve of POP-W-Me at 273 K.

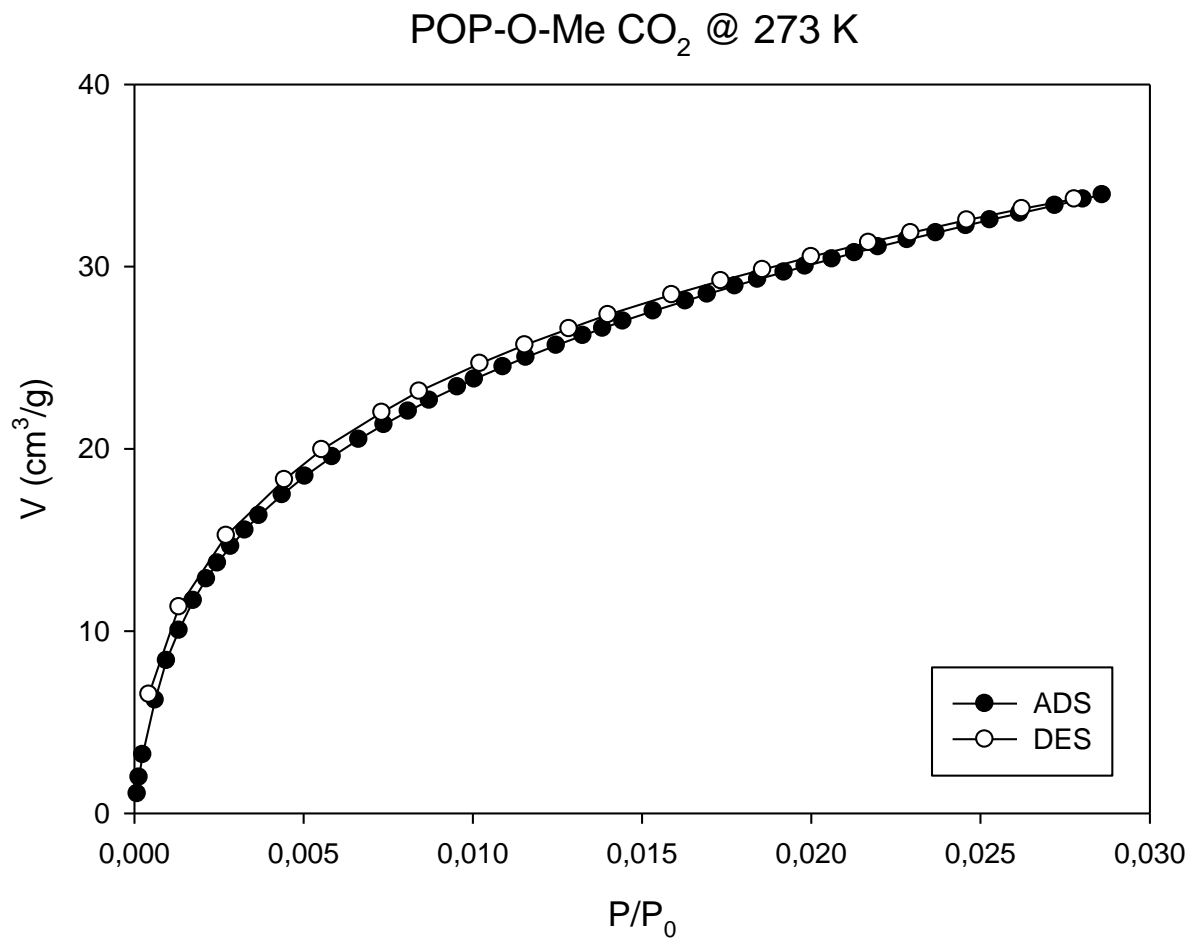

**Figure S31** CO<sub>2</sub> Adsorption-Desorption curve of POP-O-Me at 273 K.



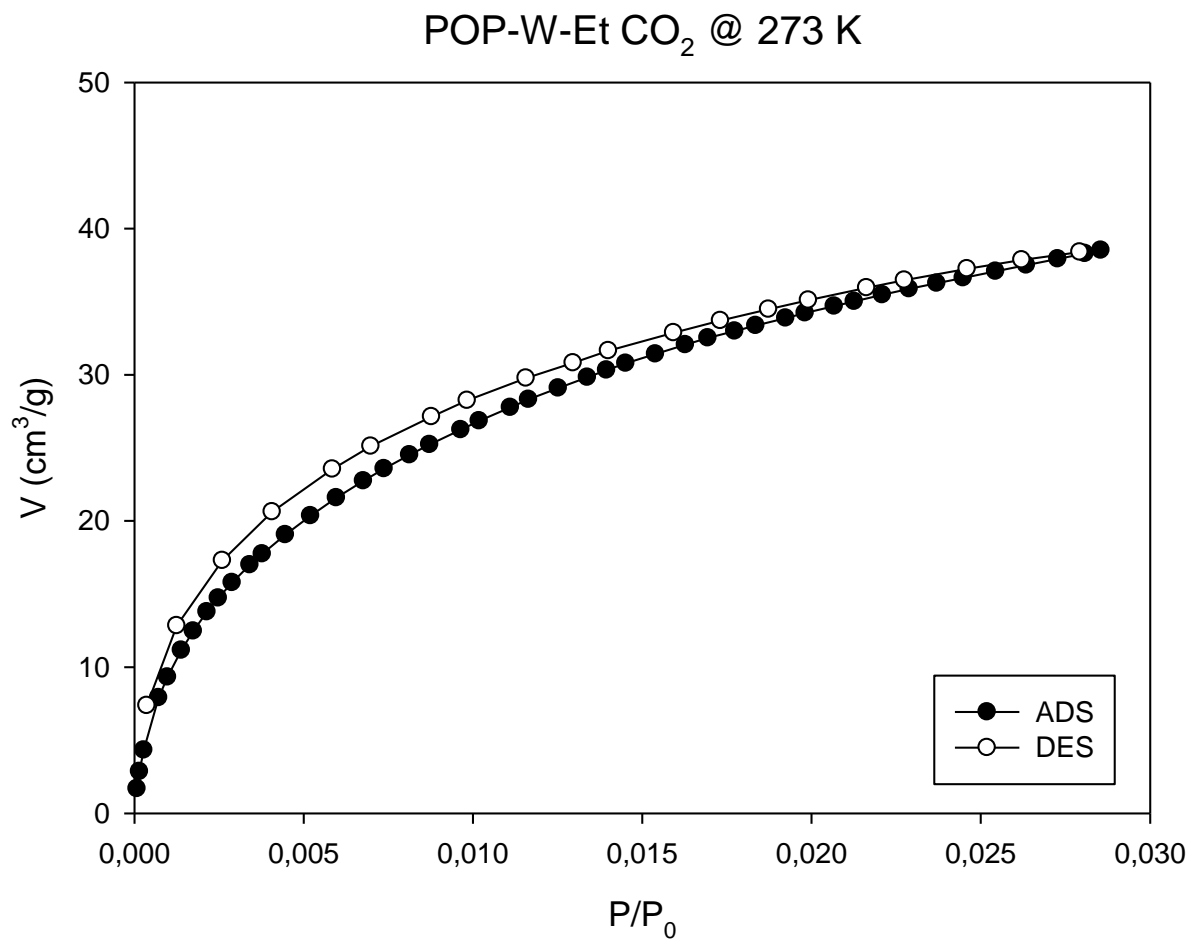

**Figure S32** CO<sub>2</sub> Adsorption-Desorption curve of POP-W-Et at 273 K.

POP-O-Et CO<sub>2</sub> @ 273 K

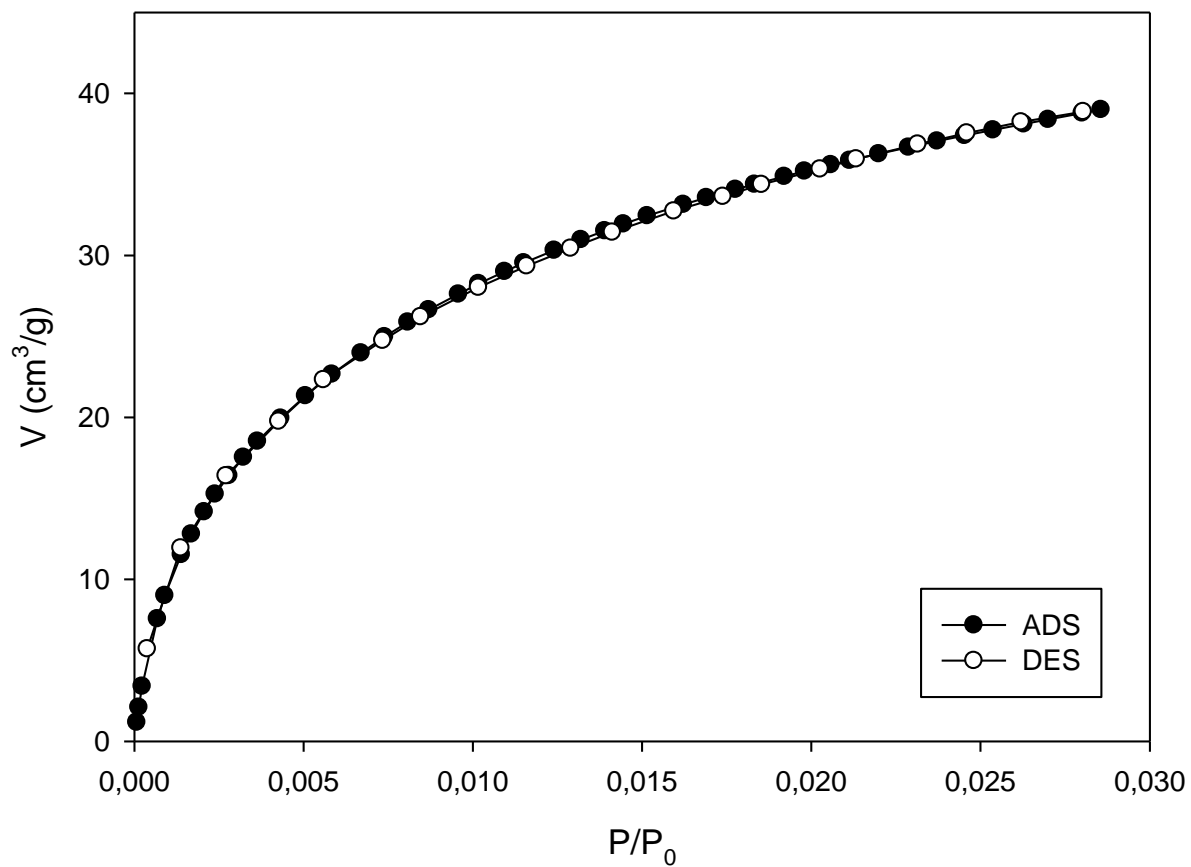

**Figure S33** CO<sub>2</sub> Adsorption-Desorption curve of POP-O-Et at 273 K.

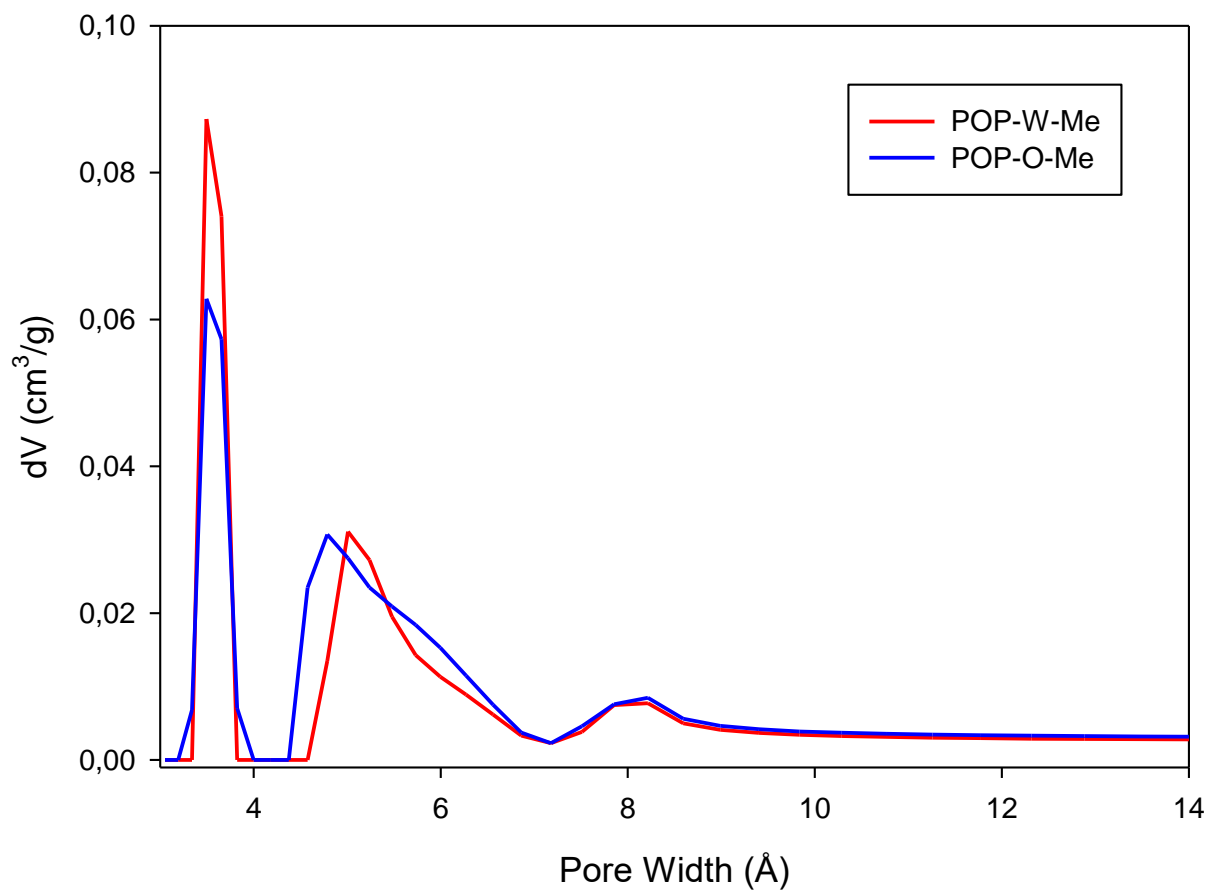

**Figure S34** PSD of POP-W-Me and POP-O-Me (red and blue line, respectively)

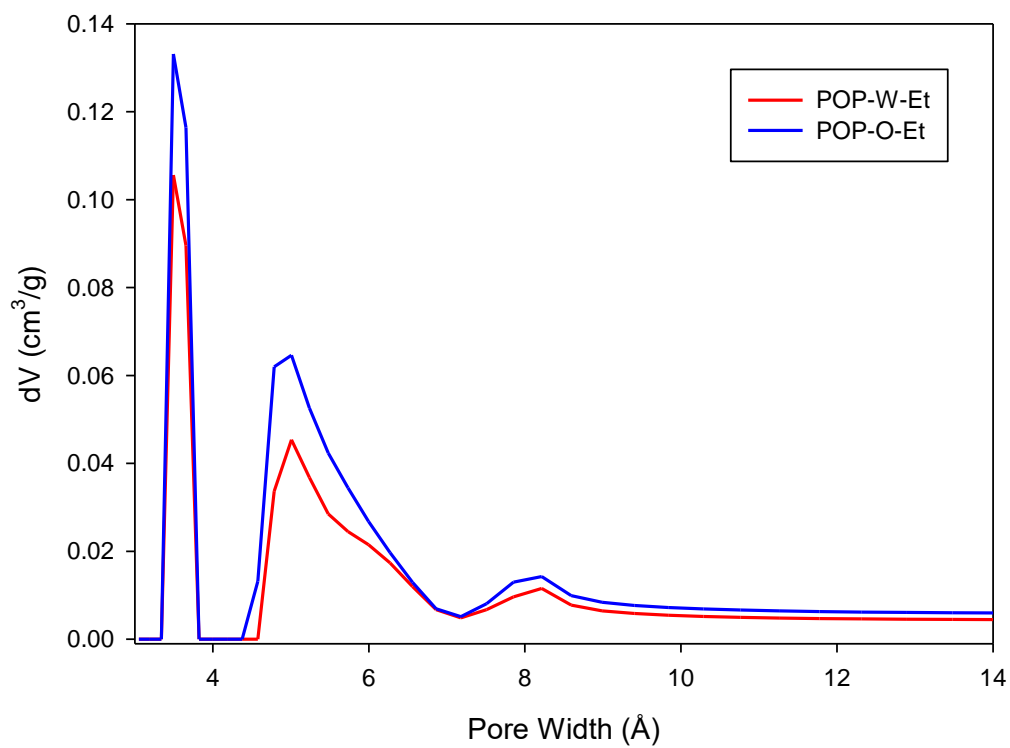

**Figure S35** PSD of POP-W-Et and POP-O-Et (red and blue line, respectively)

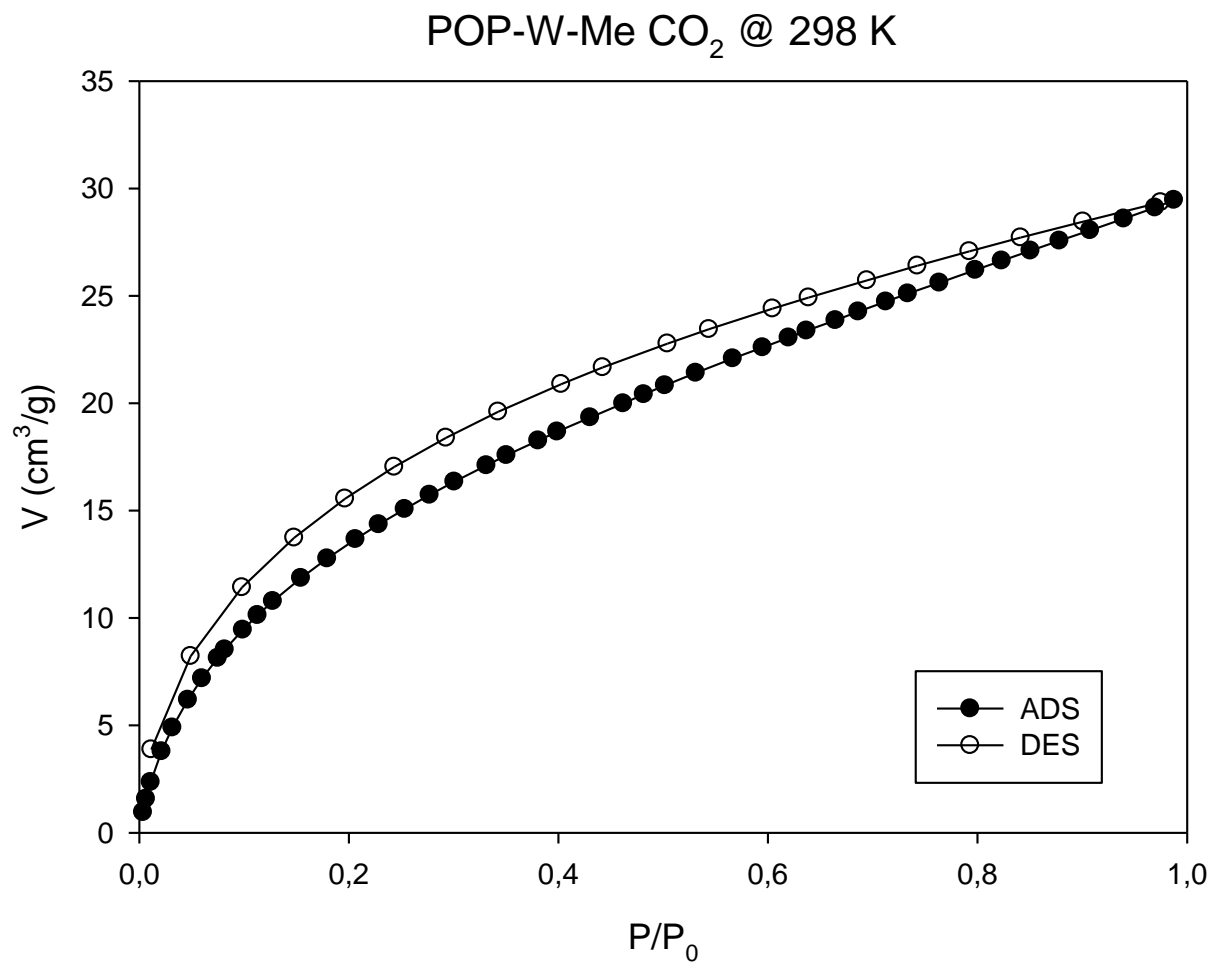

**Figure S36** CO<sub>2</sub> Adsorption-Desorption curve of POP-W-Me at 298 K.

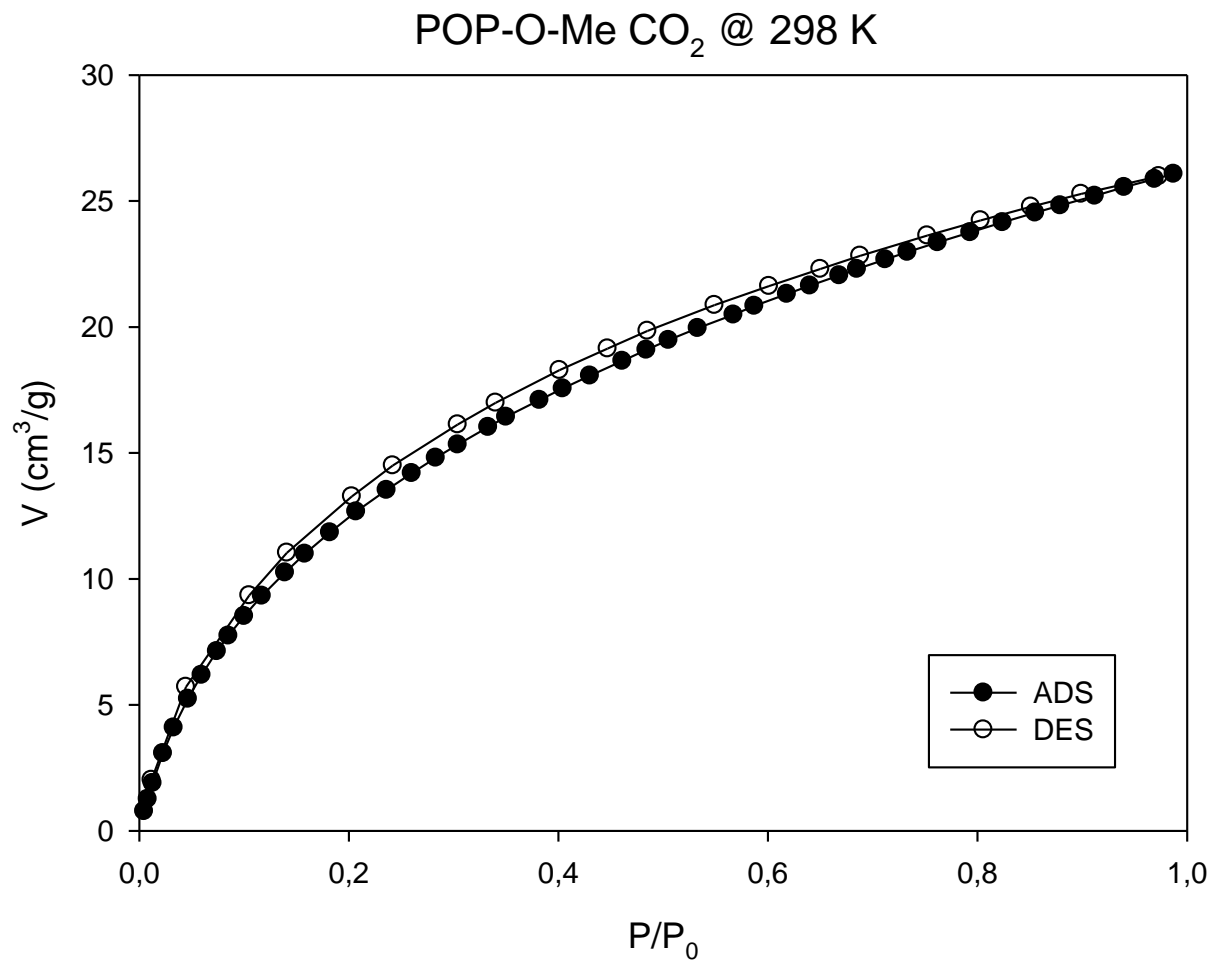

**Figure S37** CO<sub>2</sub> Adsorption-Desorption curve of POP-O-Me at 298 K.

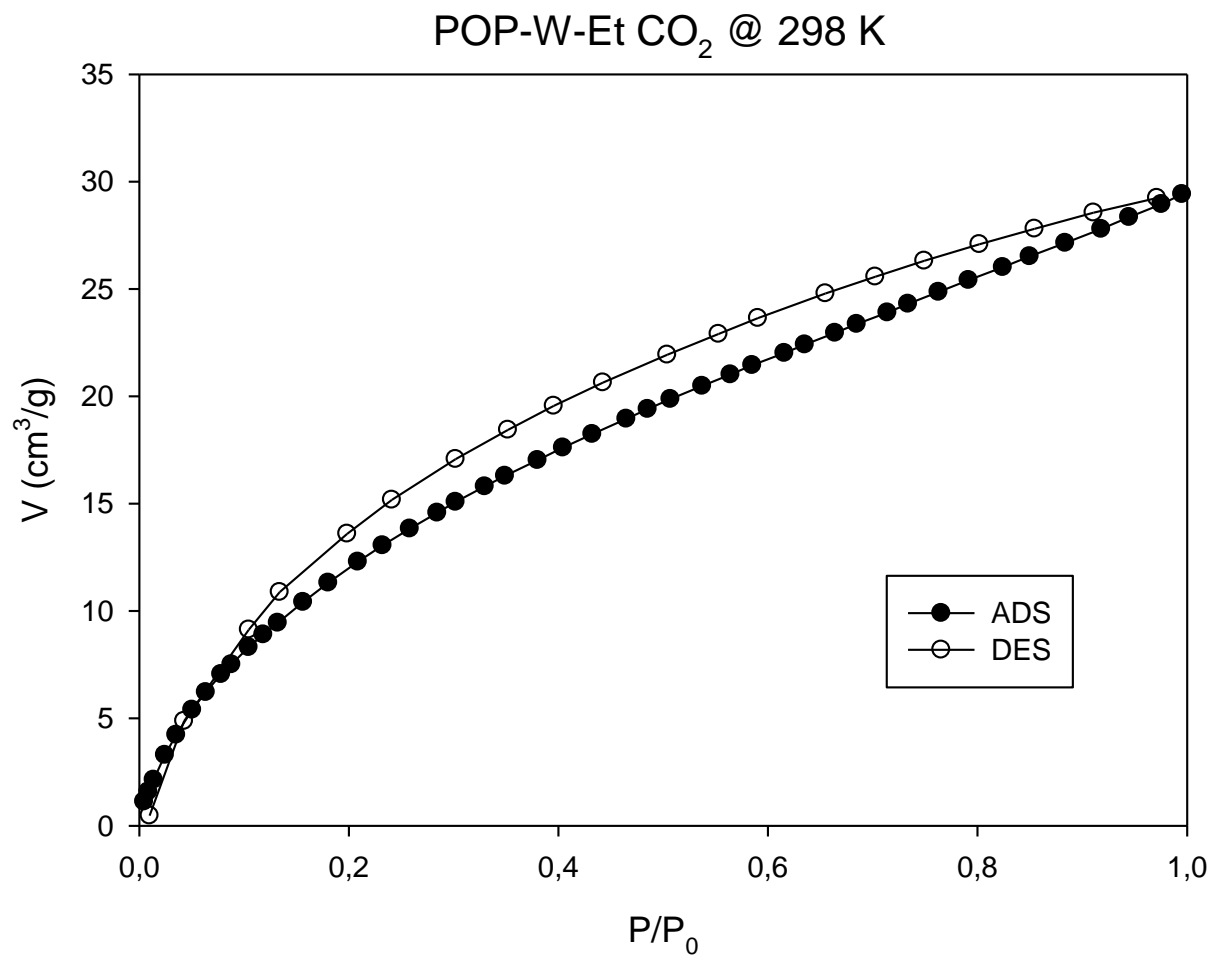

**Figure S38** CO<sub>2</sub> Adsorption-Desorption curve of POP-W-Et at 298 K.

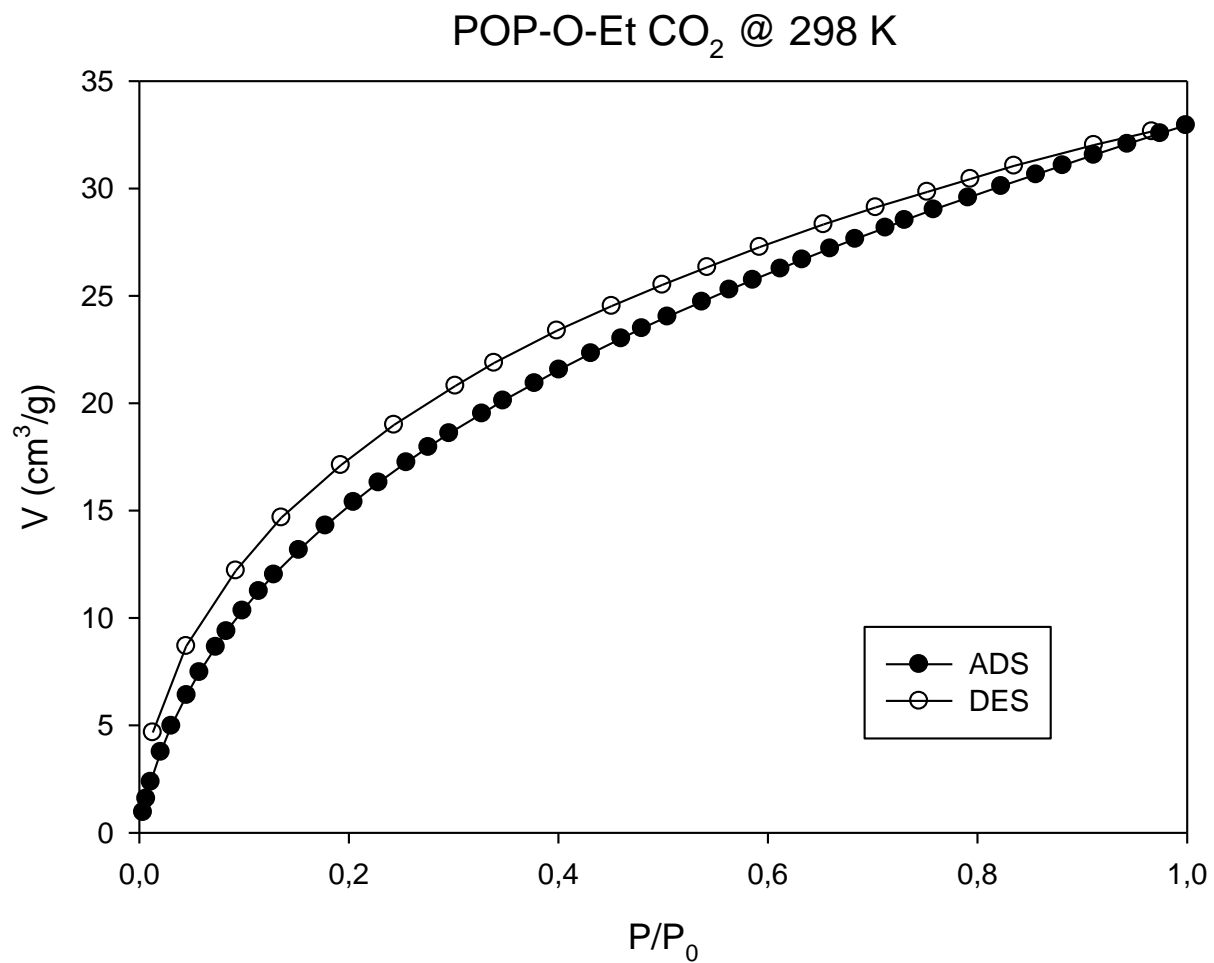

**Figure S39** CO<sub>2</sub> Adsorption-Desorption curve of POP-O-Et at 298 K.



**Table S3.** Comparison with other studies on CO<sub>2</sub>-philic POPs synthesized in water or water:ethanol mixture, in either presence or absence of catalysts (or additives).

| POP          | Solvent                          | Catalyst/additive | T°C    | Time (days) | Yield % | CO <sub>2</sub> uptake (mmol g <sup>-1</sup> ) | S <sub>ABET</sub> (m <sup>2</sup> g <sup>-1</sup> ) | Ref |
|--------------|----------------------------------|-------------------|--------|-------------|---------|------------------------------------------------|-----------------------------------------------------|-----|
| POP-W-Et     | H <sub>2</sub> O                 | //                | 70     | 3           | 90      | 1.70 <sup>a</sup>                              | 389 <sup>c</sup>                                    | *   |
| POP-W-Me     | H <sub>2</sub> O                 | //                | 70     | 3           | 93      | 1.52 <sup>a</sup>                              | 348 <sup>c</sup>                                    | *   |
| PI(TAPB-PMA) | H <sub>2</sub> O (HTP)           | AcOH              | 200    | 1           | n.a.    | 1.65 <sup>a</sup>                              | 207 <sup>c</sup>                                    | S4  |
| SMPA-TPA POP | H <sub>2</sub> O                 | AcOH              | 60/120 | 3           | 76/72   | 1.34/1.29 <sup>b</sup>                         | 680/513 <sup>d</sup>                                | S5  |
| MPA-TPA POP  | H <sub>2</sub> O/EtOH (2/1, v/v) | AcOH              | 120    | 3           | 90      | 1.49 <sup>b</sup>                              | 931 <sup>d</sup>                                    | S5  |
| HAzo-POP-3   | H <sub>2</sub> O                 | NaNO <sub>2</sub> | 0–5    | <1          | 97      | 1.70 <sup>a</sup>                              | 418 <sup>d</sup>                                    | S6  |

CO<sub>2</sub> uptake obtained from a) adsorption isotherms at 273 K (1 bar) or b) gravimetric CO<sub>2</sub> uptake measured on TGA at 298K (1 bar); S<sub>ABET</sub> values obtained using c) CO<sub>2</sub> at 195 K or d) N<sub>2</sub> at 77 K. HTP: hydrothermal polymerisation; n.a.: not available. \* This work.

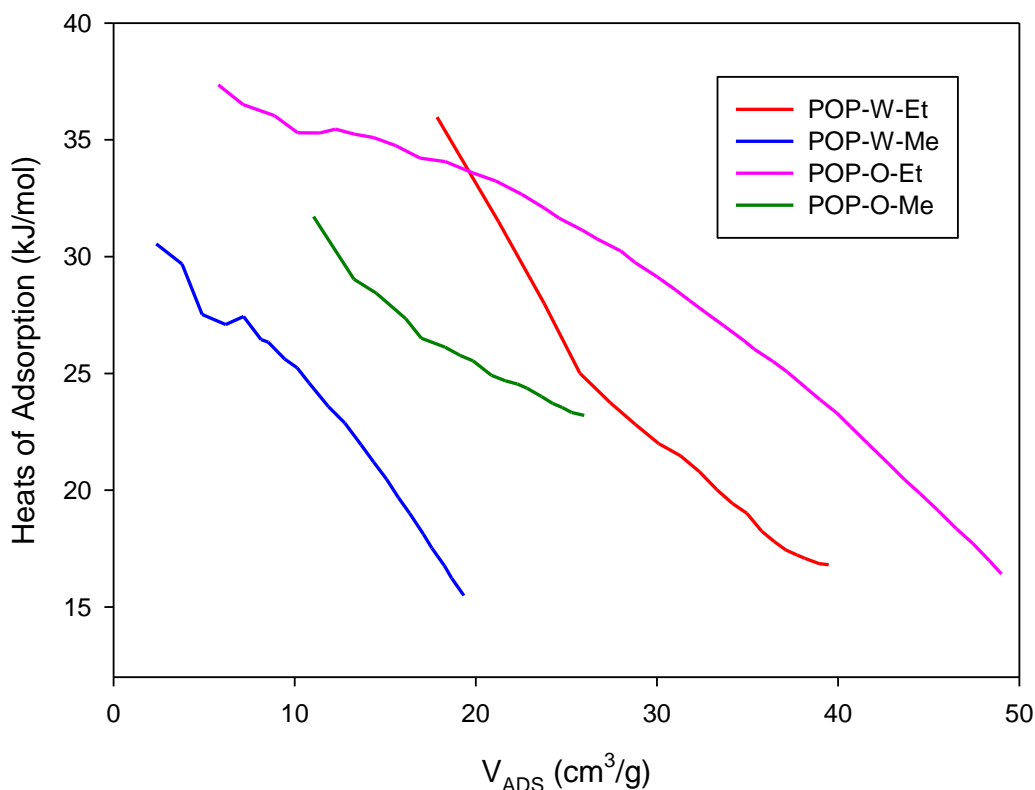

**Figure S40** Heats of adsorption of POPs

## 5. References

- S1** R. Mobili, S. La Cognata, M. Monteleone, M. Longo, A. Fuoco, S. A. Serapian, B. Vigani, C. Milanese, D. Armentano, J. C. Jansen and V Amendola, *Chem. Eur. J.*, **2023**, *29*, e202301437.
- S2** R.L. Greenaway, V. Santolini, M.J. Bennison, B.M. Alston, C.J. Pugh, M.A. Little, M. Miklitz, E.G.B. Eden-Rump, R. Clowes, A. Shakil, H. J. Cuthbertson, H. Armstrong, M. E. Briggs, K. E. Jelfs, A. I. Cooper, *Nat. Commun.* **2018**, *9*(1), 2849.
- S3** J. H. Chong, M. Sauer, B. O. Patrick, M. J. MacLachlan, *Org. Lett.*, **2003**, *5*(21), 3823–3826.
- S4** a) M. Lahnsteiner, M. Caldera, H. M. Moura, D. A. Cerron-Infantes, J. Roeser, T. Konegger, A. Thomas, J. Menche, and M. M. Unterlass, *J. Mater. Chem. A* **2021**, *9*, 19754–19769; b) B. Baumgartner, M. Puchberger and M. Unterlass, *Polym. Chem.* **2015**, *6*, 5773–5781
- S5** D. Luo, T. Shi, Q.-H. Li, Q. Xu, M. Strømme, Q.-F. Zhang, C. Xu, *Angew. Chem. Int. Ed.* **2023**, *62*, e202305225
- S6** G. Ji, Z. Yang, H. Zhang, Y. Zhao, B. Yu, Z. Ma, and Z. Liu, *Angew. Chem. Int. Ed.* **2016**, *55*, 9685–9689
